# Supplementary material for: Can hydroxylamine be a more potent nucleophile for the reactivation of tabun-inhibited AChE than prototype oxime drugs? An answer derived from quantum chemical and steered molecular dynamics studies
Source: Royal Society of Chemistry journal article supplement (doi:10.1039/c4mb00083h), 2014-05-20
Supplement: c4mb00083h1.pdf [file c4mb00083h1.pdf]

# Can hydroxylamine be a more potent nucleophile for the reactivation of tabun-inhibited AChE than prototype oxime drugs? An answer derived from quantum chemical and steered molecular dynamics studies

Rabindranath Lo and Bishwajit Ganguly\*

*Computation and Simulation Unit (Analytical Discipline and Centralized Instrument Facility), CSIR-Central Salt & Marine Chemicals Research Institute, Bhavnagar, Gujarat, India-364 002*

Fax: (+91)-278-2567562, Telephone - +91-278-2567760 Ext: 6770.

E-mail: [ganguly@csmcri.org](mailto:ganguly@csmcri.org)

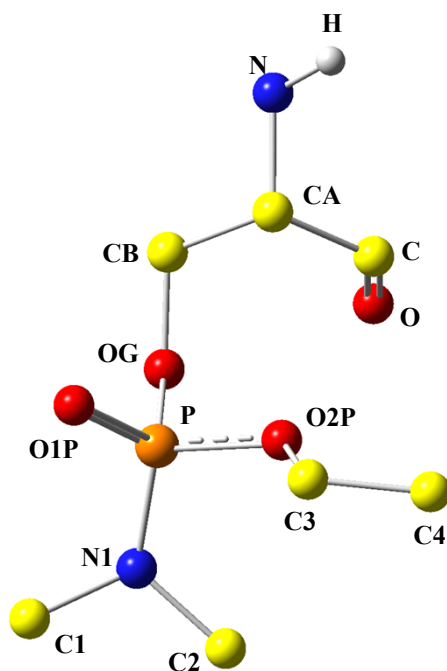

```
[ SUN ]
[ atoms ]
  N      N      -0.28000    0
  H      H       0.28000    0
  CA     CH1     0.00000    1
  CB     CH2     0.15000    1
  OG     OA     -0.36000    1
  P      P       0.76000    2
  O1P    OP     -0.63500    2
  O2P    OP     -0.36000    2
  N1     NL     -0.21700    2
  C1     CH3     0.18000    3
  C2     CH3     0.18000    3
  C3     CH2     0.15100    4
  C4     CH3     0.15100    4
  C      C       0.380     5
  O      O      -0.380     5
[ bonds ]
  N      H      gb_2
  N      CA     gb_20
  CA     C      gb_26
  C      O      gb_4
  C      +N     gb_9
  -C     N      gb_9
  CA     CB     gb_26
  CB     OG     gb_17
  P      OG     gb_27
```

```

P      N1      gb_48
P      O1P     gb_23
P      O2P     gb_27
N1     C1      gb_20
N1     C2      gb_20
C3     O2P     gb_19
C3     C4      gb_26

```

[ angles ]

```

; ai  aj  ak  gromos  type
-C   N   H   ga_31
H    N   CA  ga_17
-C   N   CA  ga_30
N    CA  C   ga_12
CA   C   +N  ga_18
CA   C   O   ga_29
O    C   +N  ga_32
N    CA  CB  ga_12
C    CA  CB  ga_12
CA   CB  OG  ga_12
CB   OG  P   ga_25
OG   P   N1  ga_47
OG   P   O1P ga_13
OG   P   O2P ga_13
N1   P   O1P ga_48
N1   P   O2P ga_47
O1P  P   O2P ga_28
P    N1  C1  ga_49
P    N1  C2  ga_48
C1   N1  C2  ga_48
P    O2P C3  ga_25
O2P  C3  C4  ga_12

```

[ impropers ]

```

; ai  aj  ak  al  gromos  type
N    -C  CA  H   gi_1
C    CA  +N  O   gi_1
CA   N   C   CB  gi_2
P    OG  N1  O1P gi_2
N1   P   C2  C1  gi_2

```

[ dihedrals ]

```

; ai  aj  ak  al  gromos  type
-CA  -C   N   CA  gd_4
-C   N   CA  C   gd_19
N    CA  C   +N  gd_20
N    CA  CB  OG  gd_17
CB   CA  C   O   gd_20
C    CA  N   H   gd_14
OG   CB  CA  C   gd_17
CA   CB  OG  P   gd_12
CB   OG  P   O2P gd_9

```

|    |     |     |    |       |
|----|-----|-----|----|-------|
| C2 | N1  | P   | OG | gd_9  |
| C3 | O2P | P   | OG | gd_9  |
| C4 | C3  | O2P | P  | gd_12 |

GROMOS bond-stretching parameters

```
#define gb_2      0.1000  1.8700e+07
#define gb_20     0.1470  8.7100e+06
#define gb_26     0.1530  7.1500e+06
#define gb_4      0.1230  1.6600e+07
#define gb_9      0.1330  1.1800e+07
#define gb_17     0.1430  8.1800e+06
#define gb_27     0.1610  4.8400e+06
#define gb_48     0.1620  3.0422e+06
#define gb_23     0.1480  8.6000e+06
#define gb_19     0.1435  6.1000e+06
```

GROMOS bond-angle bending parameters

```
#define ga_31     123.00   415.00
#define ga_17     115.00   460.00
#define ga_30     122.00   700.00
#define ga_12     109.50   520.00
#define ga_18     115.00   610.00
#define ga_29     121.00   685.00
#define ga_32     124.00   730.00
#define ga_25     120.00   530.00
#define ga_47     103.00   420.00
#define ga_13     109.60   450.00
#define ga_48     109.60   450.00
#define ga_47     103.00   420.00
#define ga_28     120.00   780.00
#define ga_49     109.50   425.00
```

GROMOS improper (harmonic) dihedral angle parameters

```
#define gi_1      0.0      167.42309
#define gi_2      35.26439  334.84617
```

GROMOS (trigonometric) dihedral torsional angle parameters

```
#define gd_4      180.000   33.5      2
#define gd_19     180.000   1.0       6
#define gd_20     0.000     1.0       6
#define gd_14     0.000     3.77     3
#define gd_17     0.000     5.86     3
#define gd_12     0.000     1.26     3
#define gd_9      0.000     3.14     2
```

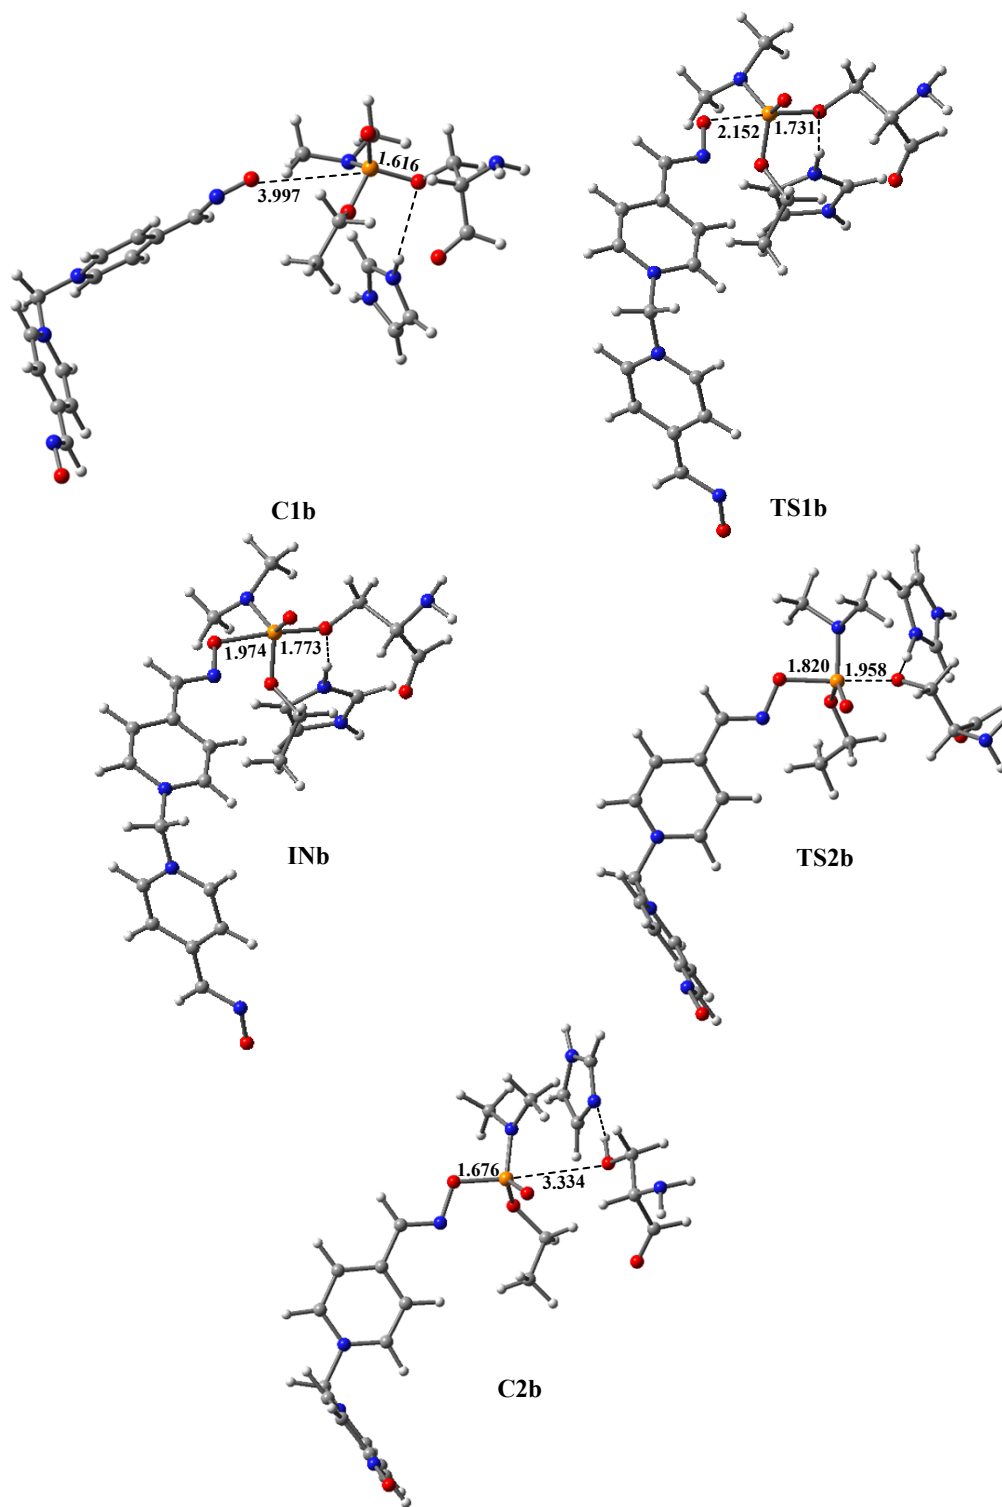

**Fig. S1** M05-2X/6-31G\* optimized geometries and selected bond distances (Å) for species involved in the reactivation process of tabun-conjugated serine (SUN) molecule with methoxime (MMB4) dianion in aqueous phase (red = oxygen; blue = nitrogen; white = hydrogen; yellow = phosphorus; gray = carbon).

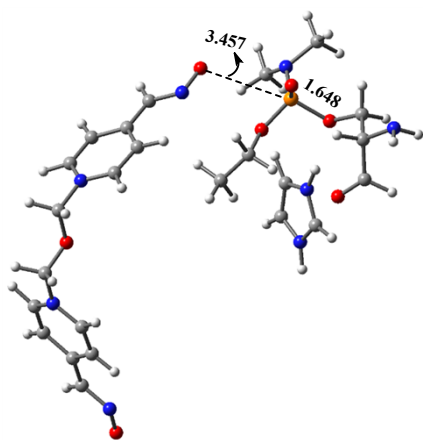

C1c

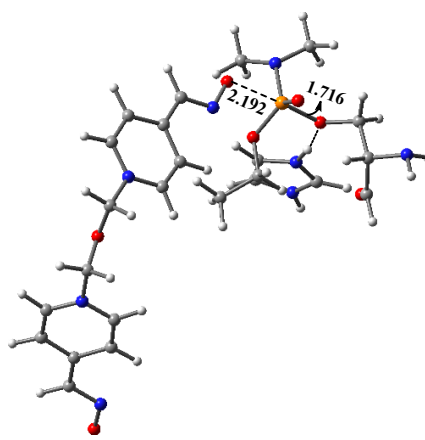

TS1c

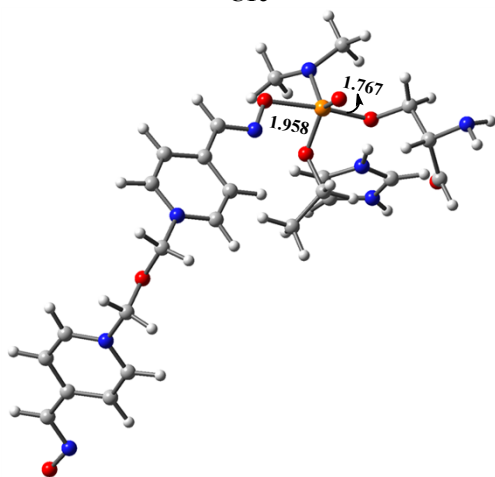

INc

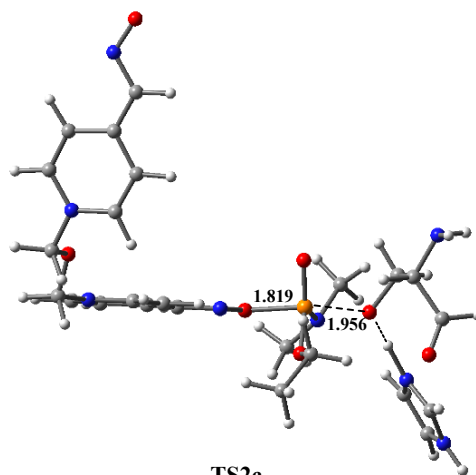

TS2c

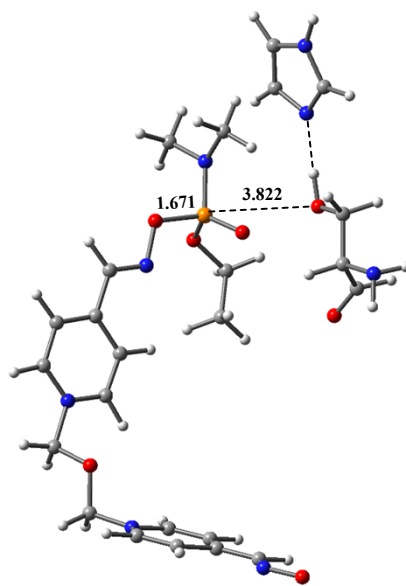

C2c

**Fig. S2** M05-2X/6-31G\* optimized geometries and selected bond distances (Å) for species involved in the reactivation process of tabun-conjugated serine (SUN) molecule with Obidoxime dianion in aqueous phase. (red = oxygen; blue = nitrogen; white = hydrogen; yellow = phosphorus; gray = carbon)

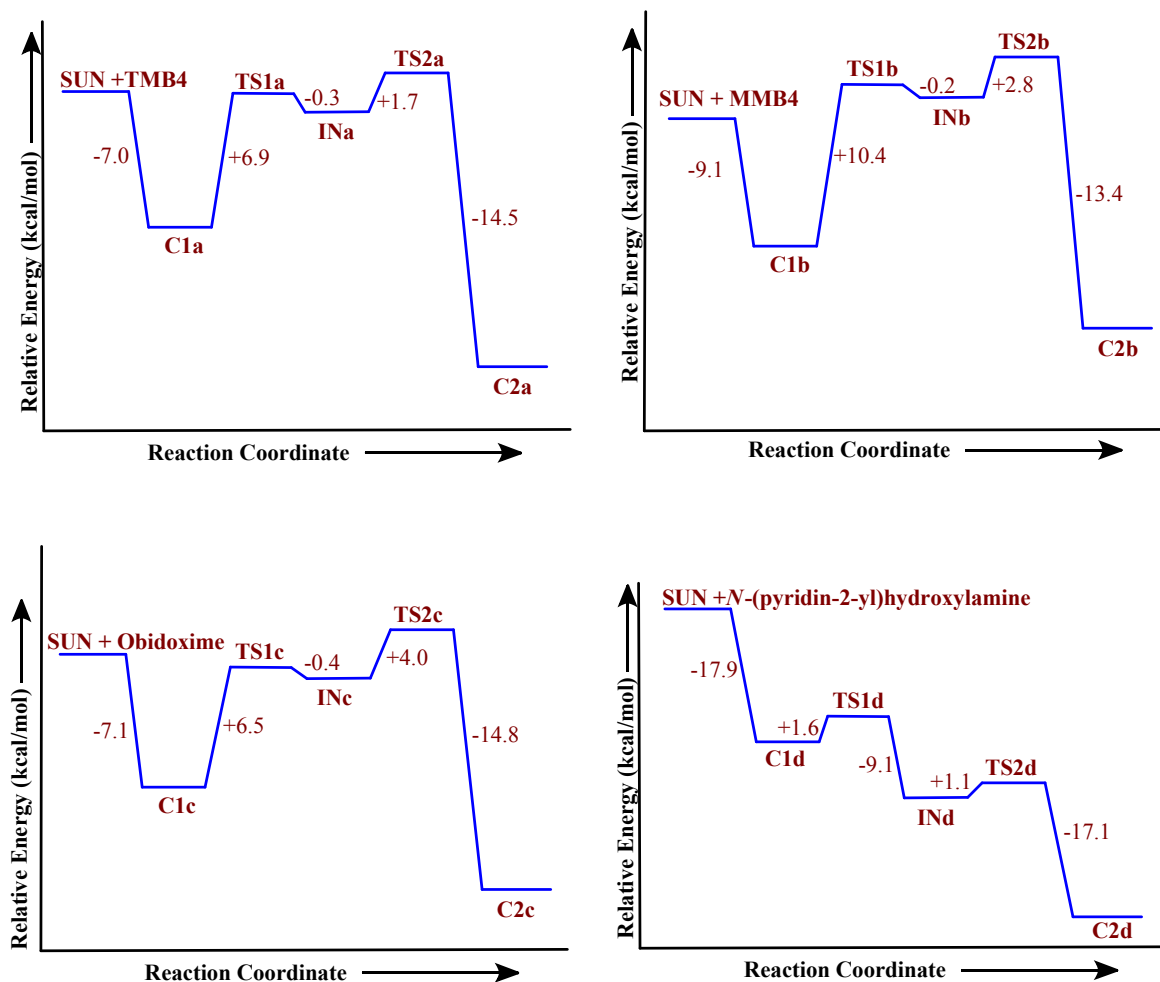

**Fig. S3** M05-2X/6-31G\* calculated energy profile diagram for the reactivation of tabun-inhibited AChE with oximes and pyridinylhydroxylamine in aqueous phase.

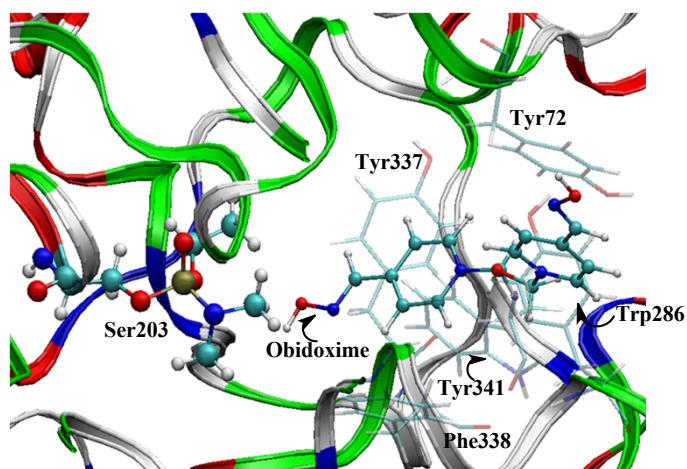

**Fig. S4** Stable conformation of tabun-inhibited AChE with obidoxime showing interaction with residues of peripheral anionic site and active site. (Cyan= carbon, blue = nitrogen, white = hydrogen, yellow-grey = phosphorus and red = oxygen) (Residues of peripheral anionic site are shown in tube format).

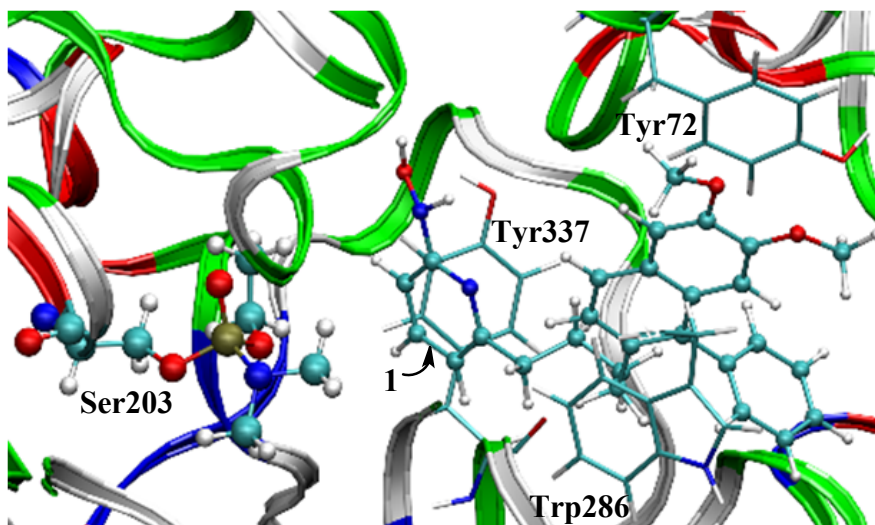

**Fig. S5** Stable conformation of tabun-inhibited AChE with **1** showing interaction with residues of peripheral anionic site and active site. (Cyan= carbon, blue = nitrogen, white = hydrogen, yellow-grey = phosphorus and red = oxygen) (Residues of peripheral anionic site are shown in tube format).



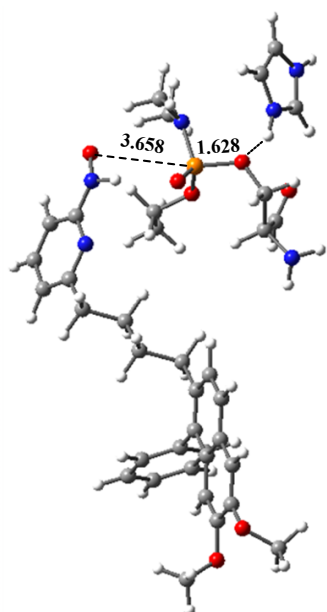

C1e

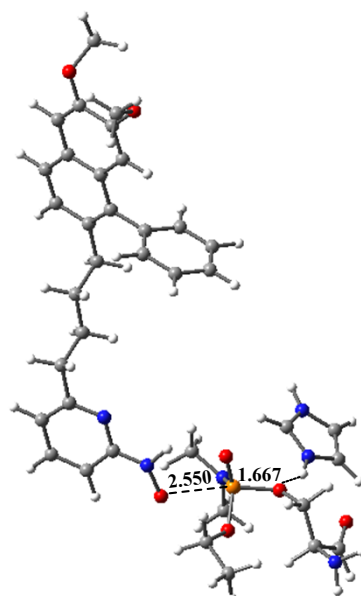

TS1e

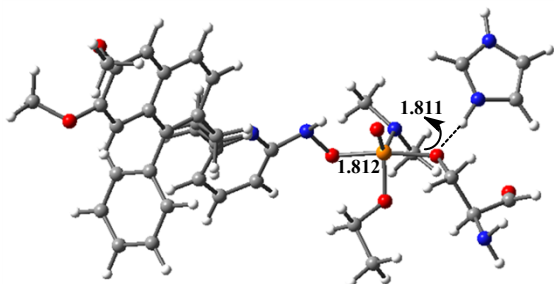

INe

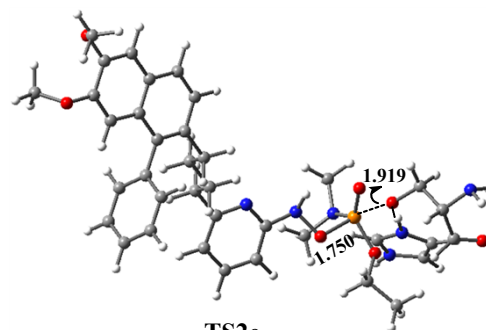

TS2e

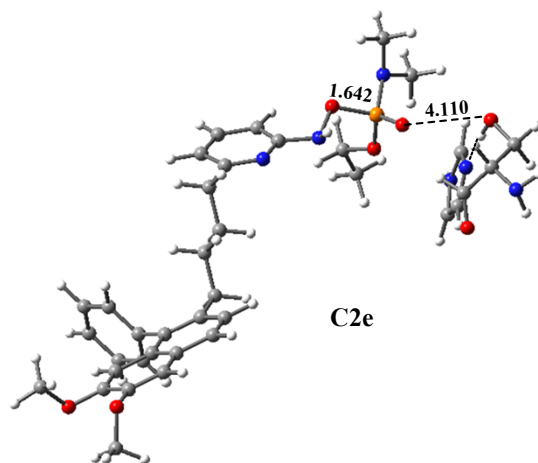

C2e

**Fig. S6** M05-2X/6-31G\* optimized geometries and selected bond distances (Å) for species involved in the reactivation process of tabun-conjugated serine (SUN) molecule with anionic form of **1** in aqueous phase. (red = oxygen; blue = nitrogen; white = hydrogen; yellow = phosphorus; gray = carbon)

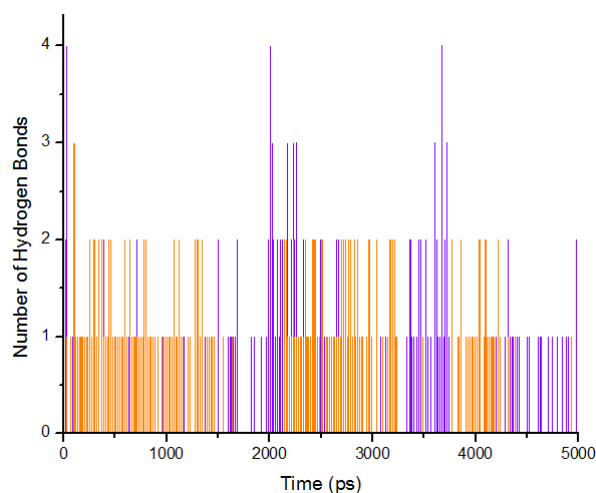

**Fig. S7** Temporal evolution of the number of hydrogen bonds formed between amino acid residues of mAChE and drugs for mAChE.TMB4 (violet) and mAChE.1 (orange).

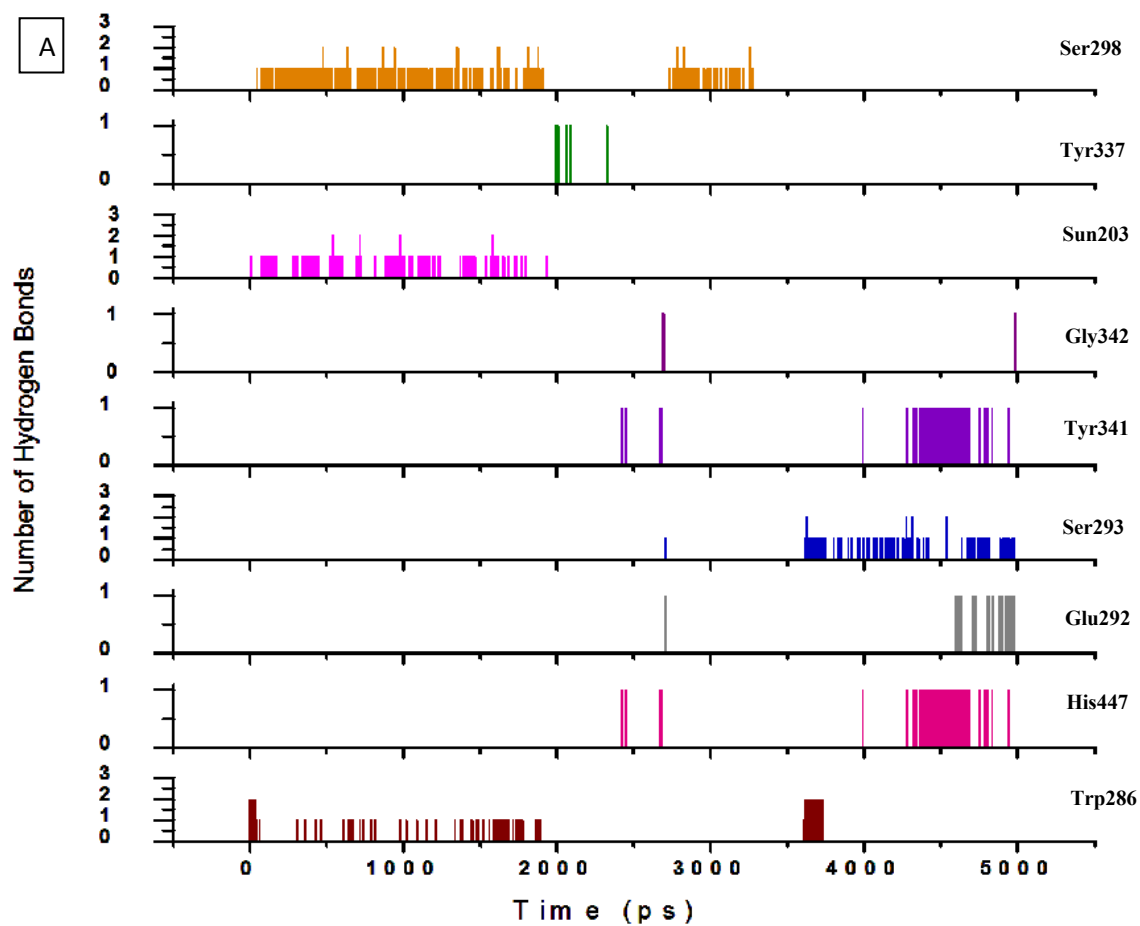

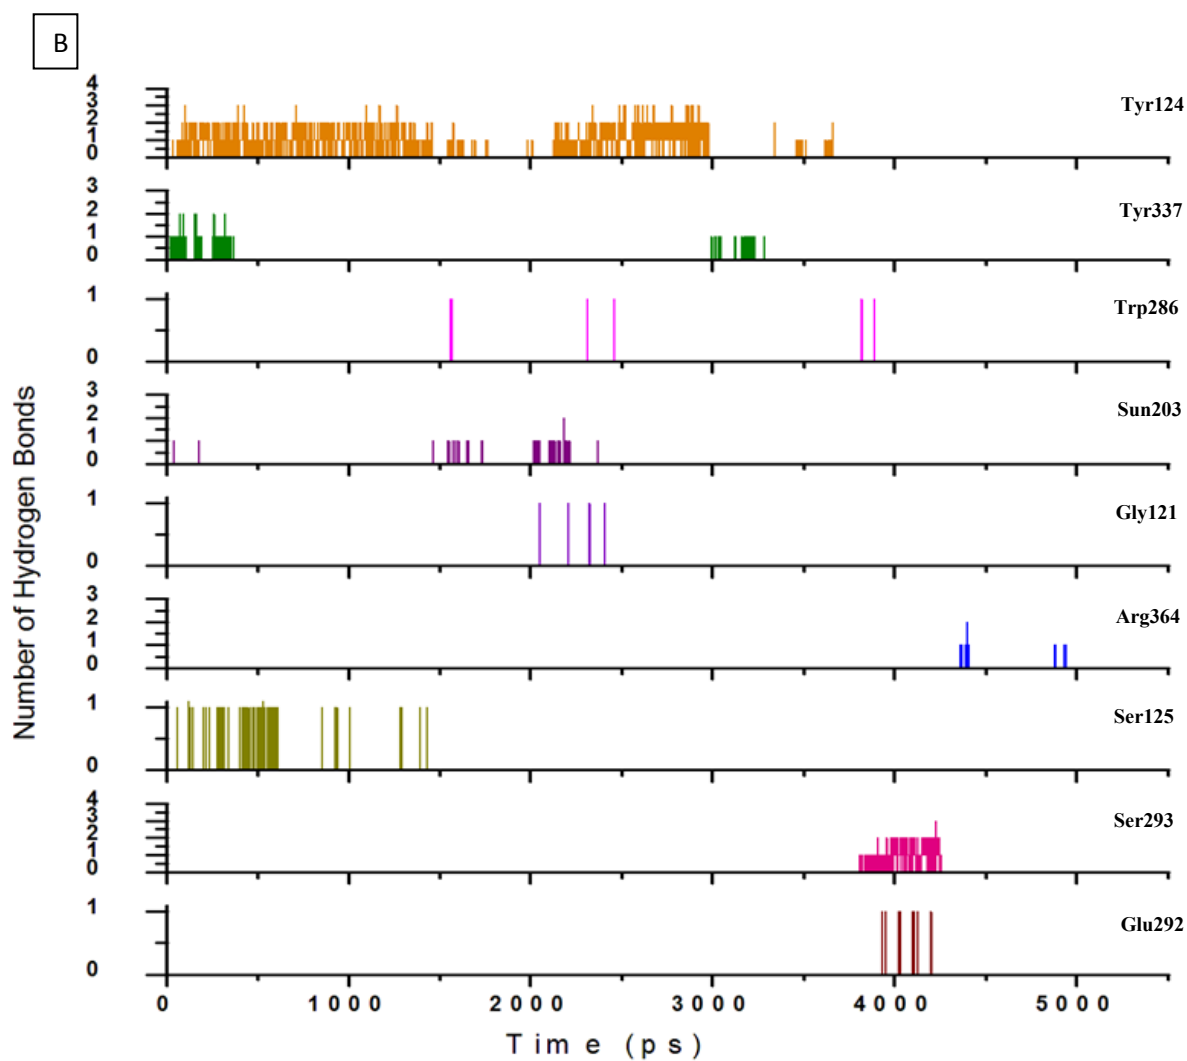

**Fig. S8** Number of direct hydrogen bonds as a function of time between amino acid residues of mAChE and TMB4 (A), **1** (B) during the process of leaving the active-site gorge.

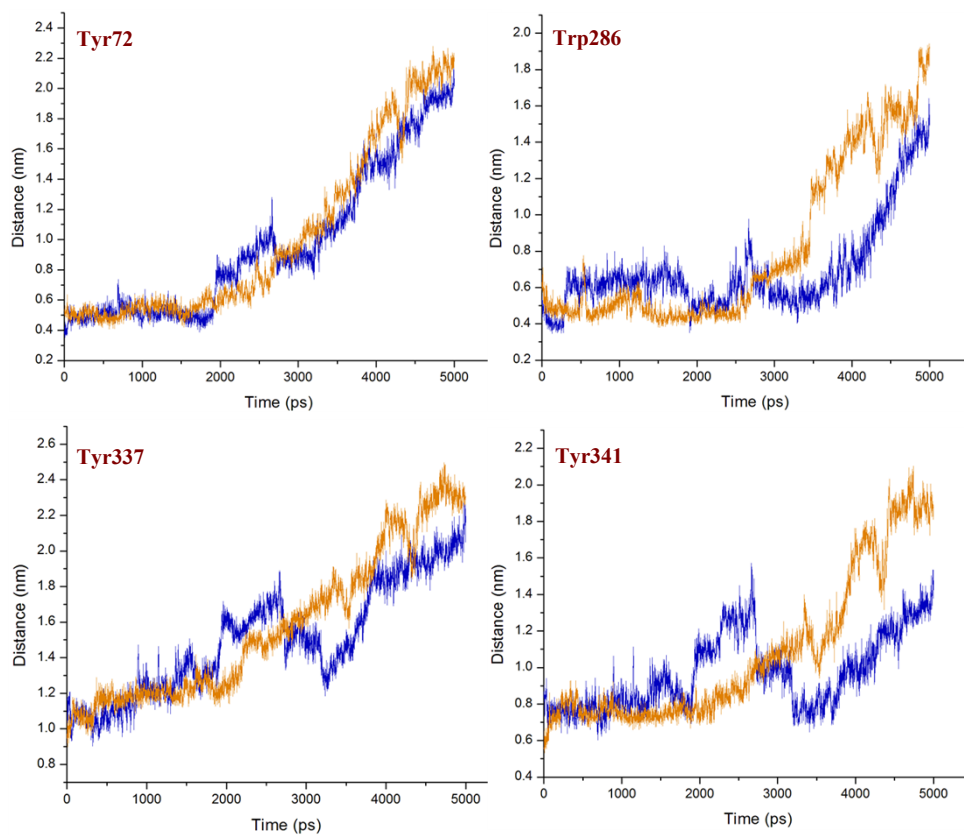

**Fig. S9** Center of mass distances between the peripheral moiety of the drugs and the hydrophobic aromatic residues of mAChE as indicated in the plots. In all the plots, the SMD pulling results shown by blue lines are for the mAChE.TMB4, and the orange lines are for the mAChE.1 complexes.

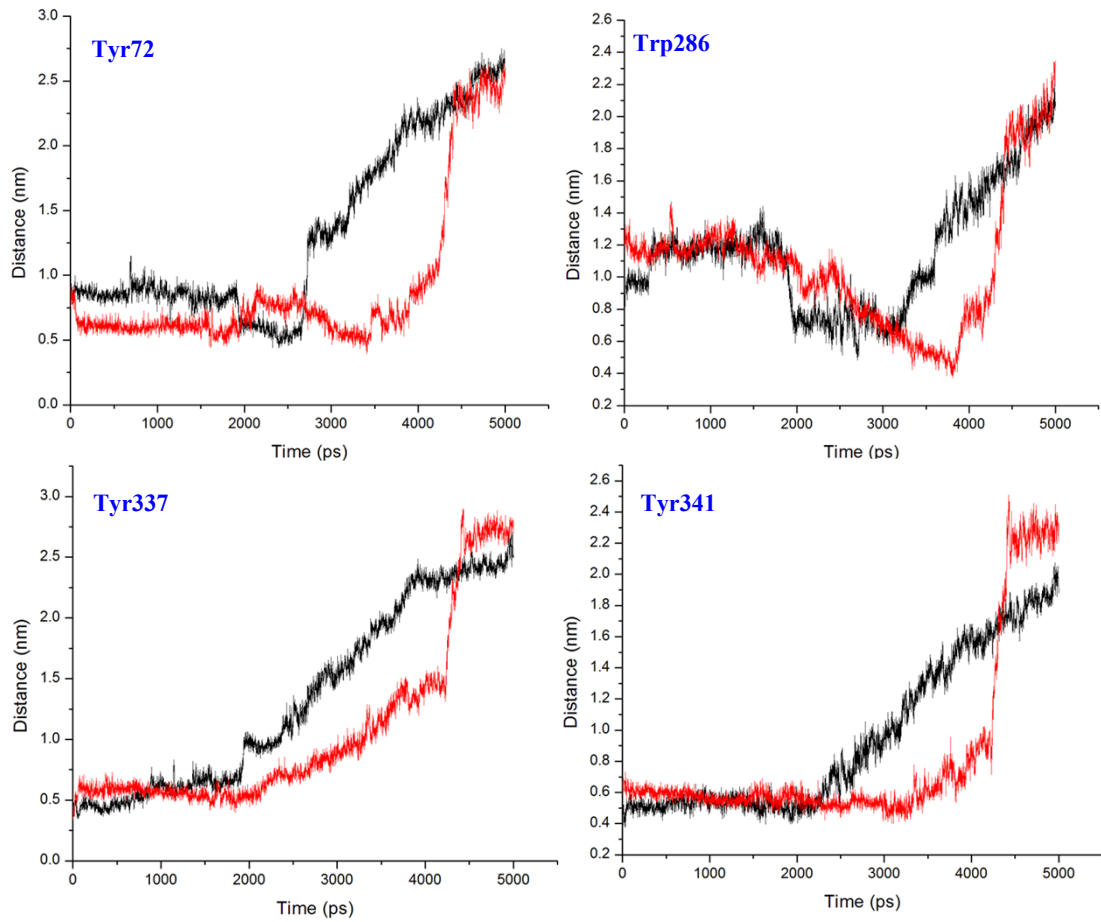

**Fig. S10** Center of mass distances between the active ring of the drugs and the hydrophobic aromatic residues of mAChE as indicated in the plots. In all the plots, the SMD pulling results shown by black lines are for the mAChE.TMB4, and the red lines are for the mAChE.1 complexes.

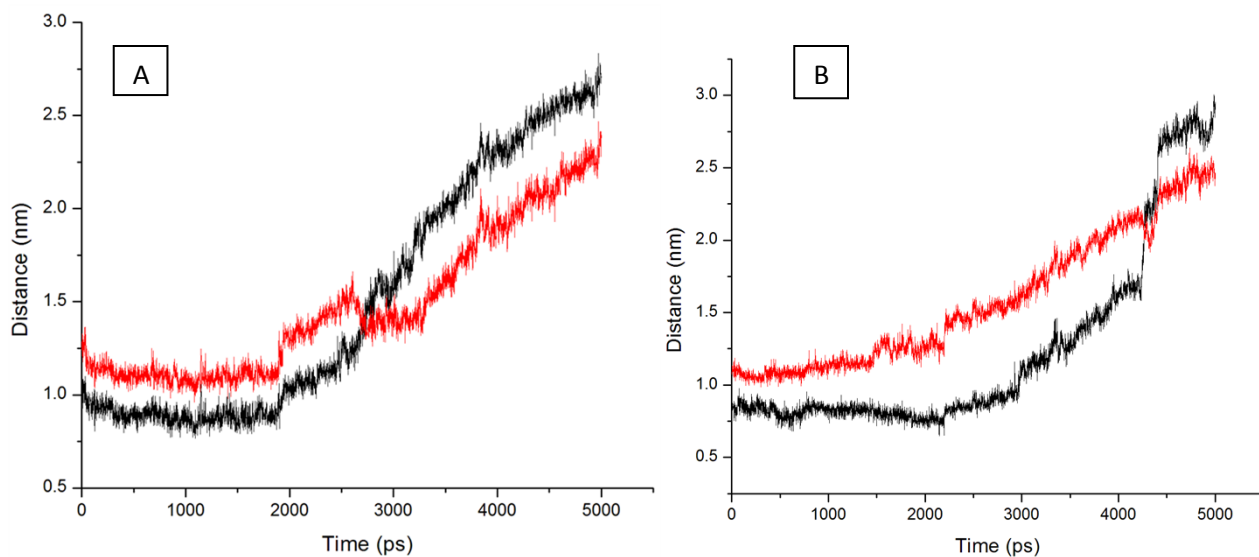

**Fig. S11** Temporal spatial distance during SMD pulling between the center of mass of active-site SUN 203 and (A) the N1 atom (black line) and the N2 atom (red line) of the two pyridinium rings of TMB4 that was initially close to active triad and the peripheral site, respectively. (B) the N1 atom (black line) of the pyridine ring and C1 atom (red line) of the peripheral site of the drug candidate **1**.

**Table S1:** Calculated toxicity limit of the studied reactivators.

|                                                                        | Toxicity limit |
|------------------------------------------------------------------------|----------------|
| TMB4                                                                   | 71%            |
| MMB4                                                                   | 47%            |
| Obidoxime                                                              | 47%            |
| <i>N</i> -(pyridin-2-yl)hydroxylamine                                  | 64%            |
| phenyltetrahydroisoquinoline<br>pyridinealdoxime compound <sup>a</sup> | 71%            |

<sup>a</sup> Compound **1d** from ref 16.

**MP2/6-31+G\*\*/M05-2X/6-31G\* calculated Cartesian coordinates of all stationary points, including electronic energies and imaginary frequencies of transition states geometries. (All energies are given in Hartree).**

**Tabun**

E= -1252.22947

|   |             |             |             |
|---|-------------|-------------|-------------|
| N | -0.01818000 | 4.18777300  | -1.22194800 |
| C | -0.41469000 | 2.92313600  | -0.64008500 |
| C | 0.76780500  | 1.96694700  | -0.43593200 |
| O | 0.27238000  | 0.69833000  | 0.05901000  |
| C | -1.07848300 | 3.16073600  | 0.69950300  |
| O | -1.06650700 | 4.23477900  | 1.25496300  |
| O | 2.32503400  | 0.25609900  | 1.58901700  |
| P | 1.37608700  | -0.35053300 | 0.62274100  |
| N | 0.35543500  | -1.56638900 | 1.12392800  |
| C | -0.39739300 | -1.26556500 | 2.35024800  |
| C | 0.90764300  | -2.92770400 | 1.12074800  |
| O | 2.04759600  | -0.92089000 | -0.70739300 |
| C | 3.48378800  | -1.16158500 | -0.77389300 |
| C | 3.85381500  | -1.25801900 | -2.23523200 |
| C | -3.57671300 | -2.54433900 | -0.88783200 |
| N | -4.26008600 | -1.35193100 | -0.81259900 |
| C | -2.26320100 | -2.24606600 | -0.70252000 |
| C | -3.40552800 | -0.35781200 | -0.59180000 |
| N | -2.18975500 | -0.88453600 | -0.52259100 |
| H | -1.55359400 | 2.28534100  | 1.16681300  |
| H | 0.51525300  | 4.72040800  | -0.54418100 |
| H | 0.57071600  | 4.03485100  | -2.03221300 |
| H | -1.14118600 | 2.42612100  | -1.29107200 |
| H | 1.47345300  | 2.38011600  | 0.28547800  |
| H | 1.27203500  | 1.79464600  | -1.38730500 |
| H | -1.33063300 | -0.36105600 | -0.35476400 |
| H | -3.65710300 | 0.68255100  | -0.48738000 |
| H | -1.38824100 | -2.86903900 | -0.68561600 |
| H | -5.25967000 | -1.23733200 | -0.90747800 |
| H | -4.07493900 | -3.47974600 | -1.06328200 |
| H | 3.62182700  | -0.32407500 | -2.74743800 |
| H | 4.92294600  | -1.45231000 | -2.32777900 |
| H | 3.30872500  | -2.07075400 | -2.71522900 |
| H | 3.69386900  | -2.09037300 | -0.24386500 |
| H | 3.99537400  | -0.34163000 | -0.27517600 |
| H | 0.22317500  | -1.37493200 | 3.24409900  |
| H | -0.78693000 | -0.24886200 | 2.30833100  |
| H | -1.24004000 | -1.95469600 | 2.41354200  |
| H | 1.65212800  | -3.07310700 | 1.90952900  |
| H | 0.08675700  | -3.62495200 | 1.29071400  |
| H | 1.35258100  | -3.14251700 | 0.15162700  |

**TMB4**

E= -947.66047

|   |             |             |             |
|---|-------------|-------------|-------------|
| C | 2.95495000  | -0.41619400 | -1.18176600 |
| C | 3.05829300  | -1.33914600 | 0.97252300  |
| C | 4.14121400  | -0.57078700 | 1.28181600  |
| C | 4.69126000  | 0.33796400  | 0.33151500  |
| C | 5.80950300  | 1.12744800  | 0.64601000  |
| N | 6.30113800  | 1.96643800  | -0.27701500 |
| O | 7.30117600  | 2.63978300  | 0.06886000  |
| C | 4.03310700  | 0.37709100  | -0.93497400 |
| N | 2.46648100  | -1.27627400 | -0.24718200 |
| C | -2.95518300 | -0.41602200 | -1.18221300 |
| C | -3.05795400 | -1.33906200 | 0.97204700  |
| C | -4.14086100 | -0.57078700 | 1.28163600  |
| C | -4.69119700 | 0.33794900  | 0.33152300  |
| C | -5.80941800 | 1.12738200  | 0.64627100  |
| N | -6.30137900 | 1.96625800  | -0.27666900 |
| O | -7.30142700 | 2.63949200  | 0.06941900  |
| C | -4.03334700 | 0.37717300  | -0.93512100 |
| N | -2.46643600 | -1.27610000 | -0.24779500 |
| C | 1.25536400  | -2.05676600 | -0.52951200 |
| C | -1.25529900 | -2.05651500 | -0.53031400 |
| H | 2.62222700  | -2.03505500 | 1.67498000  |
| H | 2.43694900  | -0.40877600 | -2.13044100 |
| H | 4.58254600  | -0.66348900 | 2.26413400  |
| H | 6.28235900  | 1.06673200  | 1.62244300  |
| H | 4.39387300  | 1.03859800  | -1.70694300 |
| H | -2.62169800 | -2.03499100 | 1.67436600  |
| H | -2.43739000 | -0.40844700 | -2.13099900 |
| H | -4.58189800 | -0.66362900 | 2.26407500  |
| H | -6.28200700 | 1.06671200  | 1.62283700  |
| H | -4.39432600 | 1.03869100  | -1.70697900 |
| H | 1.30190800  | -2.96709600 | 0.06625800  |
| H | 1.28159400  | -2.34124100 | -1.58097100 |
| H | -1.28127100 | -2.34026000 | -1.58197600 |
| H | -1.30209000 | -2.96724500 | 0.06482800  |
| C | 0.00000600  | -1.24905000 | -0.20849100 |
| H | 0.00024400  | -0.32727500 | -0.79555700 |
| H | -0.00027000 | -0.97373500 | 0.84864100  |

**C1a**

E= -2199.89937

|   |             |             |             |
|---|-------------|-------------|-------------|
| N | -6.85589600 | 1.84875600  | 3.45678900  |
| C | -5.80197400 | 1.67660800  | 2.47133500  |
| C | -6.45492700 | 1.25339900  | 1.14853700  |
| O | -5.47444000 | 0.96282100  | 0.13998300  |
| C | -4.96333900 | 2.91341300  | 2.23481100  |
| O | -3.87079100 | 2.89181900  | 1.70563400  |
| O | -4.97208600 | -1.24341700 | 1.35030800  |
| P | -4.83312500 | -0.55153900 | 0.04504100  |
| N | -5.53445800 | -1.28731500 | -1.25548600 |



C -6.99734900 -1.28789800 -1.23863600  
C -4.94569800 -1.20918500 -2.59005300  
O -3.36588500 -0.20219300 -0.46281700  
C -2.30136200 -0.09714800 0.53480800  
C -1.01184300 0.15897400 -0.20873300  
H -6.45696900 2.00089000 4.37552400  
H -5.14072600 0.86446400 2.77710800  
H -7.07493000 0.38299300 1.35555200  
H -7.08055300 2.04933300 0.74510900  
H -5.41487800 3.86896900 2.55304500  
H -7.35362700 -2.09024600 -1.88475600  
H -7.41255700 -0.33734600 -1.58983800  
H -5.16735000 -0.25616300 -3.08350800  
H -5.37184600 -2.01290700 -3.19181000  
H -3.87282200 -1.35960600 -2.52011500  
H -2.55237700 0.72154200 1.21008200  
H -2.26301100 -1.03758000 1.07839300  
H -0.19038200 0.22357400 0.50656000  
H -1.05831700 1.09334900 -0.76911200  
H -0.81085600 -0.66314400 -0.89592300  
C -2.31678300 3.38594000 -2.89704000  
N -2.17647600 4.30914200 -1.88538100  
C -3.09853600 2.39039300 -2.40052600  
C -2.84259700 3.90189000 -0.80897800  
N -3.40880500 2.73969100 -1.10667800  
H -3.44101400 1.47348800 -2.84274700  
H -2.90967100 4.40645000 0.13749500  
H -3.98714600 2.19646500 -0.46492900  
H -1.85575800 3.51463400 -3.85888500  
H -7.41763500 2.66610600 3.24045000  
H -7.35785700 -1.48710000 -0.22889800  
C 2.91588800 -3.96097700 -0.64279000  
C 2.05937600 -2.92606400 1.28052100  
C 0.79003500 -2.98104000 0.78997500  
C 0.52927600 -3.55274200 -0.49159500  
H 2.28738900 -2.50038400 2.24733900  
H 3.79680300 -4.32994500 -1.14923200  
H -0.02445200 -2.59340400 1.38215800  
C -0.75784100 -3.64427000 -1.04985900  
H -0.91478500 -4.08217500 -2.03193500  
N -1.80673100 -3.19321700 -0.34950800  
O -2.92890900 -3.30888600 -0.89902100  
C 1.66977600 -4.04267700 -1.19036200  
H 1.55734000 -4.49456000 -2.16583800  
N 3.11952700 -3.41439500 0.58295200  
C 7.86745400 -0.60821900 -0.44814000  
C 7.06028100 0.51327800 1.44749400  
C 7.58418400 1.69396600 1.01792900  
C 8.29979000 1.76803000 -0.21543400  
H 6.51514500 0.42710900 2.37680400  
H 7.94061800 -1.55070800 -0.97214300  
H 7.45900500 2.58095900 1.61909400  
C 8.86505900 2.95501200 -0.70984500  
H 9.40458400 2.96981400 -1.65281900  
N 8.73407400 4.08631400 -0.00276300  
O 9.26118600 5.11074800 -0.49828900  
C 8.41546000 0.54217700 -0.93284800

H 8.94561700 0.51067700 -1.87428500  
N 7.19911600 -0.63598500 0.73293600  
H -1.64891100 5.16881900 -1.94124300  
C 4.48200600 -3.28221300 1.11436300  
H 4.41792800 -3.31913400 2.20087500  
H 5.05183500 -4.14882500 0.78207100  
C 6.55405500 -1.87365300 1.18875300  
H 7.16743600 -2.70910000 0.85401100  
H 6.55961900 -1.86796700 2.27782700  
C 5.13166100 -1.98279500 0.64433100  
H 4.53910500 -1.13099800 0.98633600  
H 5.15551700 -1.95853900 -0.44797100

**TS1a**

E= -2199.88774792

N -6.73747100 -0.66888400 3.57182100  
C -5.87425400 0.01707600 2.62040900  
C -6.30748500 -0.35860000 1.19664300  
O -5.37672300 0.12049100 0.23902900  
C -5.92997900 1.52151900 2.73591900  
O -5.02284600 2.27126700 2.43895000  
O -4.21376300 -2.07160600 0.50710500  
P -4.24356800 -0.95588200 -0.48494000  
N -4.98570200 -1.08929900 -1.97935000  
C -6.44364100 -1.03927200 -2.00031900  
C -4.38317000 -0.49973400 -3.17023000  
O -3.11618000 0.20315300 -0.56069500  
C -2.41432700 0.51813600 0.67005100  
C -1.13853100 1.23554800 0.29044200  
H -6.45152400 -0.45707900 4.52089000  
H -4.84292200 -0.31581000 2.74591500  
H -6.38117300 -1.44380100 1.16579000  
H -7.28469100 0.07548600 0.96581700  
H -6.89806000 1.92473400 3.08537100  
H -6.78179500 -1.48935000 -2.93526500  
H -6.82910300 -0.01615600 -1.93792900  
H -4.74525400 0.52277900 -3.33218400  
H -4.65754300 -1.09739100 -4.04230200  
H -3.30244200 -0.49442100 -3.07652100  
H -3.06361800 1.13818600 1.29018800  
H -2.20184300 -0.41246400 1.19377000  
H -0.56976000 1.48217200 1.18837000  
H -1.35937700 2.16031200 -0.24463700  
H -0.53234500 0.59336200 -0.34923800  
C -3.80836400 4.36502100 -1.78337500  
N -4.51791700 4.90989000 -0.73741400  
C -3.87298000 3.01578500 -1.62626600  
C -4.99809100 3.93725300 0.03301300  
N -4.61719200 2.78077900 -0.49256100  
H -3.44551300 2.21388000 -2.19851500  
H -5.56832100 4.06209000 0.93516800  
H -4.86332100 1.85155900 -0.12012500  
H -3.32802900 4.97186100 -2.52843000  
H -7.69442400 -0.34279500 3.47767100  
H -6.86052700 -1.62412500 -1.18112900  
C 2.92600000 -3.63206500 -0.68546300

C 2.11262200 -2.27204900 1.04136600  
C 0.88443800 -2.19209000 0.44854700  
C 0.63965800 -2.85363300 -0.78053800  
H 2.33886200 -1.78115100 1.97679700  
H 3.77089600 -4.18113100 -1.07606100  
H 0.09925800 -1.62574700 0.92549200  
C -0.61737700 -2.80065400 -1.45323000  
H -0.76634900 -3.34113600 -2.38373500  
N -1.58436500 -2.08059900 -0.93431600  
O -2.68127500 -2.07348800 -1.59028300  
C 1.71699500 -3.58839500 -1.32645800  
H 1.60020000 -4.12415600 -2.25774200  
N 3.12273700 -2.98495200 0.48520400  
C 8.21935100 -0.80003100 -0.31956000  
C 7.40800200 0.52659900 1.43777100  
C 8.08956000 1.61311400 0.98151000  
C 8.89515400 1.52709300 -0.19445000  
H 6.79135700 0.56157000 2.32473200  
H 8.22477900 -1.77831600 -0.77892800  
H 8.02087200 2.54691400 1.51719500  
C 9.62237100 2.60994500 -0.71400900  
H 10.22361100 2.50221900 -1.61281700  
N 9.57171000 3.79436500 -0.08755200  
O 10.24289000 4.71958400 -0.60327200  
C 8.92491200 0.25023700 -0.82694400  
H 9.51407300 0.09946000 -1.72062900  
N 7.46898700 -0.67647000 0.80504600  
H -4.65274300 5.89571700 -0.56434600  
C 4.45330200 -2.98442000 1.11659300  
H 4.30518900 -2.94241500 2.19444300  
H 4.93085700 -3.93246400 0.87603800  
C 6.65952900 -1.80451200 1.28062900  
H 7.20188700 -2.72138900 1.05382100  
H 6.57714700 -1.72071000 2.36324500  
C 5.28181200 -1.80202400 0.62137200  
H 4.76526800 -0.86794300 0.85426800  
H 5.39457600 -1.86222300 -0.46369900

**INa**

E= -2199.88890

N -4.43638500 4.91704700 -0.18535100  
C -4.54938600 3.49749200 -0.50020500  
C -4.87440800 2.72895800 0.78848500  
O -4.88169100 1.33752700 0.56593600  
C -5.64211700 3.20571500 -1.49845400  
O -5.58070300 2.36850400 -2.37581300  
O -2.65984600 1.32373100 1.63590200  
P -3.62764500 0.24498100 1.22976000  
N -4.80040400 -0.50312800 2.20054300  
C -5.46528600 0.33917300 3.18961500  
C -4.71314100 -1.89008000 2.64468400  
O -3.61292500 -0.55228200 -0.19008300  
C -3.08771500 0.11449100 -1.35272600  
C -2.63169500 -0.95897300 -2.31833900  
H -4.22894600 5.44928400 -1.02274300

H -3.60098400 3.12548000 -0.88953000  
H -4.12063400 2.99655300 1.52581900  
H -5.86181700 3.03789000 1.15426900  
H -6.55896600 3.81004200 -1.36526900  
H -4.91629200 0.36262700 4.13821300  
H -6.46385900 -0.06016800 3.38386800  
H -5.72302700 -2.21271500 2.91482400  
H -4.06607700 -2.01963500 3.51726500  
H -4.34842000 -2.52397400 1.84126400  
H -3.86711000 0.74086200 -1.78656300  
H -2.25208300 0.75046300 -1.05462600  
H -2.22969300 -0.50474200 -3.22536900  
H -3.47052300 -1.60038200 -2.59350400  
H -1.85826700 -1.57394600 -1.85620000  
C -7.91236800 -2.00272500 -1.03030700  
N -7.97179400 -1.18844700 -2.13838600  
C -7.06616500 -1.39326400 -0.15638000  
C -7.19413600 -0.12247400 -1.95135900  
N -6.63911400 -0.23166200 -0.75335700  
H -6.72607400 -1.67295700 0.82341900  
H -7.03831700 0.68713400 -2.64263400  
H -5.96860600 0.44274300 -0.31443800  
H -8.46410400 -2.92232800 -0.96559500  
H -5.31952300 5.26923200 0.17151100  
H -5.57375400 1.35492600 2.82133000  
C 2.96931000 -3.04536200 0.37365000  
C 2.21749700 -1.39044100 -1.10438400  
C 1.04556700 -1.25238300 -0.40823800  
C 0.80828300 -2.004436200 0.73300500  
H 2.44411800 -0.80798600 -1.98531100  
H 3.76558700 -3.73013400 0.62598300  
H 0.30838600 -0.53638100 -0.73899100  
C -0.41437500 -1.95228100 1.49988500  
H -0.54759700 -2.56669800 2.38612700  
N -1.33223400 -1.13636700 1.09775700  
O -2.40982200 -1.12084500 1.83764400  
C 1.81400800 -2.95033600 1.11033100  
H 1.69200500 -3.58598900 1.97566900  
N 3.16098000 -2.27957400 -0.71907700  
C 4.43302700 -2.36233700 -1.46353400  
H 4.20926000 -2.17694500 -2.51238000  
H 4.80019900 -3.38229200 -1.36835200  
C 7.82135800 0.73965300 -1.66436000  
C 8.54764800 -0.85994300 -0.10803600  
C 9.42638600 0.02079700 0.44309500  
C 9.53755900 1.35200000 -0.06190500  
H 8.44293100 -1.87356200 0.25208200  
H 7.16220300 0.95322900 -2.49388300  
H 10.04695100 -0.29311500 1.26777200  
C 10.42529200 2.30441600 0.46394600  
H 10.48181800 3.30806500 0.05170000  
N 11.21559100 1.96374800 1.49246400  
O 11.98475500 2.85848700 1.91656600  
C 8.68096400 1.66767600 -1.15659400  
H 8.70677500 2.65278900 -1.60077800  
N 7.74973700 -0.51747000 -1.15632500  
H -8.51730700 -1.36171100 -2.96998600

C 6.76236800 -1.47157800 -1.67364600  
H 7.18301100 -2.47105500 -1.57263900  
H 6.62805500 -1.26799400 -2.73496100  
C 5.44001200 -1.35366200 -0.91742800  
H 5.60720800 -1.54144700 0.14561200  
H 5.04444500 -0.34090500 -1.02328200

**TS2a**

E= -2199.88521

N -4.69717600 4.80566200 0.12194300  
C -4.72225900 3.43236000 -0.36825700  
C -4.96107500 2.48715800 0.81753400  
O -4.87831700 1.13695200 0.41987300  
C -5.81403900 3.19140700 -1.38212200  
O -5.70623100 2.49624600 -2.37069700  
O -2.62583300 1.05034600 1.47945700  
P -3.47770300 -0.09305700 1.01850600  
N -4.68237100 -0.84770000 1.93050300  
C -5.13192200 -0.11121300 3.10798500  
C -4.67913300 -2.29325400 2.13475700  
O -3.52233200 -0.66970100 -0.48978400  
C -3.15881500 0.18033200 -1.59985700  
C -2.58276400 -0.71318600 -2.67750500  
H -4.52607100 5.44851300 -0.64285700  
H -3.76163600 3.18058500 -0.81934700  
H -4.19677100 2.69471200 1.56347600  
H -5.95037500 2.68299800 1.25095500  
H -6.77523400 3.68748800 -1.14751900  
H -4.45052400 -0.23579800 3.95755300  
H -6.11525100 -0.48282200 3.40513600  
H -5.69470700 -2.59473700 2.40286800  
H -3.99819100 -2.60804600 2.93083100  
H -4.40223000 -2.80049100 1.21372500  
H -4.04537300 0.71268900 -1.93817000  
H -2.42193500 0.91071900 -1.26166900  
H -2.29811500 -0.11588500 -3.54510600  
H -3.32009900 -1.45276700 -2.99251500  
H -1.70211900 -1.23594700 -2.30262800  
C -8.80990700 -1.23388300 -0.23021700  
N -8.72074300 -0.56707900 -1.42823600  
C -7.72658400 -0.83684300 0.49584100  
C -7.62325600 0.20110900 -1.41532900  
N -7.00188700 0.05630700 -0.25686200  
H -7.41636600 -1.12375200 1.48380900  
H -7.30783100 0.83807300 -2.22415100  
H -5.93627900 0.59768300 0.08786900  
H -9.61316500 -1.91304700 -0.00986100  
H -5.59950800 5.05583000 0.51504900  
H -5.22281300 0.94856400 2.88294600  
C 3.13826300 -3.17527700 0.07211400  
C 2.47317300 -1.36749000 -1.26201500  
C 1.26222100 -1.29563700 -0.62109100  
C 0.96595900 -2.20322100 0.40984500  
H 2.75113400 -0.69797700 -2.06266600  
H 3.91878400 -3.88772100 0.29375100  
H 0.54517600 -0.54378300 -0.91440500

C -0.30772900 -2.18539300 1.11648600  
H -0.48795900 -2.89393900 1.92010100  
N -1.19419800 -1.32891400 0.76223500  
O -2.32020400 -1.41314500 1.46903700  
C 1.94039700 -3.15023000 0.74929000  
H 1.76822200 -3.87234900 1.53438900  
N 3.38863000 -2.29979500 -0.91903100  
C 7.99999600 0.87275300 -1.55592400  
C 8.69842800 -0.74934300 -0.00956200  
C 9.52778500 0.13867800 0.60355400  
C 9.62670400 1.48515400 0.13756300  
H 8.60394700 -1.77438500 0.32001500  
H 7.37231400 1.09169800 -2.40817000  
H 10.11800900 -0.18119300 1.44807500  
C 10.46463600 2.44590400 0.72517100  
H 10.51072500 3.46104500 0.34089200  
N 11.22102500 2.09977500 1.77739900  
O 11.94629400 3.00372500 2.25534000  
C 8.81092700 1.80843700 -0.98601400  
H 8.82994100 2.80553500 -1.40290700  
N 7.94024000 -0.39926400 -1.08468700  
H -9.37051600 -0.63842000 -2.19632000  
C 4.69665900 -2.31648800 -1.60687400  
H 4.51480500 -2.08559100 -2.65491200  
H 5.08357100 -3.33120300 -1.54184700  
C 7.00547800 -1.36385400 -1.67373700  
H 7.45167900 -2.35388900 -1.59100400  
H 6.90543400 -1.12635200 -2.73177000  
C 5.65138800 -1.31235600 -0.96788100  
H 5.77940800 -1.54779300 0.09098200  
H 5.23662100 -0.30448100 -1.04339000

**C2a**

E= -2199.91442

N -5.23706000 4.64461500 0.66372000  
C -5.10702100 3.48895700 -0.22309300  
C -6.06158900 2.39351200 0.23137500  
O -6.06263200 1.38954300 -0.76024300  
C -5.43053500 3.84840300 -1.65606200  
O -4.66616200 3.73150100 -2.58888400  
O -2.89714700 1.14778800 0.63350300  
P -3.33225100 -0.24511700 0.38924700  
N -4.61800000 -0.78021700 1.26619600  
C -4.60768000 -0.45198900 2.69376200  
C -5.16212600 -2.10800000 0.97594500  
O -3.59040200 -0.67928000 -1.11341000  
C -3.49501100 0.29199900 -2.20140700  
C -2.05885300 0.44596700 -2.64987400  
H -4.55973900 5.35560400 0.41250100  
H -4.08667900 3.10901500 -0.18364000  
H -5.72215500 2.01771800 1.20167300  
H -7.06599300 2.82165500 0.36142900  
H -6.43858700 4.28220700 -1.80430400  
H -5.63536300 -0.46379800 3.05841600  
H -4.19523200 0.54453500 2.83731800  
H -6.15964000 -2.17079100 1.41033300

H -4.53586900 -2.90063000 1.39822800  
H -5.24726500 -2.24246100 -0.09969200  
H -4.11964000 -0.12683100 -2.98660600  
H -3.92799800 1.23019500 -1.87072800  
H -2.02235500 1.10842500 -3.51678200  
H -1.63401500 -0.51945000 -2.92755100  
H -1.45745400 0.88145900 -1.85161700  
C -9.12018100 -2.19564100 0.98589000  
N -8.94093900 -1.34825500 2.04982800  
C -8.52713600 -1.57018100 -0.07688300  
C -8.26547400 -0.26503200 1.60702100  
N -7.99599300 -0.36609300 0.32173700  
H -8.44756500 -1.91528300 -1.09432600  
H -7.99886000 0.55928300 2.24810600  
H -6.69305500 0.69529800 -0.46206300  
H -9.63661600 -3.13416500 1.08005000  
H -6.15545100 5.06537100 0.55716500  
H -4.02026500 -1.17461000 3.26968100  
C 3.36899300 -3.03768000 -0.32847700  
C 2.76739100 -1.22113300 -1.68281900  
C 1.51507300 -1.17098300 -1.11659100  
C 1.17837900 -2.08897100 -0.11496400  
H 3.08482000 -0.54057600 -2.45891200  
H 4.14199100 -3.74525300 -0.06803200  
H 0.80760900 -0.42691700 -1.45061200  
C -0.14105900 -2.08531300 0.53033000  
H -0.35900400 -2.80822900 1.31091000  
N -1.00102100 -1.22721000 0.15272900  
O -2.17832500 -1.36384000 0.85630800  
C 2.12925300 -3.03356100 0.27503300  
H 1.91624900 -3.76613800 1.04016400  
N 3.66784200 -2.14417200 -1.28729300  
C 8.34491800 0.96677300 -1.18372400  
C 8.91544600 -0.84017100 0.20155700  
C 9.69944600 -0.04494000 0.97875000  
C 9.84025600 1.34659000 0.68945100  
H 8.79237600 -1.89637500 0.39468400  
H 7.78510500 1.29607900 -2.04771000  
H 10.22184200 -0.47353400 1.81955900  
C 10.63534400 2.21614400 1.45248500  
H 10.72102800 3.26917200 1.19844400  
N 11.29832100 1.73340100 2.51399100  
O 11.98874800 2.56037500 3.15473500  
C 9.11486800 1.81466700 -0.44507200  
H 9.17072000 2.85448300 -0.73499000  
N 8.24265600 -0.35212400 -0.87638000  
H -9.26477300 -1.49810900 2.99207900  
C 5.02893400 -2.13078600 -1.87006400  
H 4.93723100 -1.79733700 -2.90144700  
H 5.38963500 -3.15703100 -1.87009000  
C 7.34960100 -1.22480500 -1.64600500  
H 7.77167200 -2.22869400 -1.63005200  
H 7.34922300 -0.87519600 -2.67736000  
C 5.93884500 -1.21301700 -1.05825800  
H 5.97167600 -1.55026700 -0.01986600  
H 5.54239200 -0.19522700 -1.07070300

**MMB4**

E= -869.31178

C 1.96166900 -1.48852900 -1.21784400  
C 1.56102100 -0.64644900 0.94876000  
C 2.66115400 0.14387000 0.88373100  
C 3.49096700 0.15011100 -0.28517100  
H 0.91770500 -0.66996900 1.81716000  
H 1.63185000 -2.15690100 -2.00006000  
H 2.91427900 0.77221000 1.72311400  
C 4.63399600 0.94344100 -0.40746900  
H 5.24377100 0.92410500 -1.30593000  
N 4.98205900 1.74834200 0.61577600  
O 6.01312500 2.43144000 0.44488100  
C 3.07665200 -0.71975800 -1.33979900  
H 3.65009700 -0.77576200 -2.25418600  
N 1.19929500 -1.46158900 -0.08817600  
C 0.00015100 -2.28455100 0.02635300  
H 0.05846100 -2.90391500 0.91745300  
H -0.05606300 -2.92378200 -0.85065800  
C -1.92219300 -1.41056400 1.27620700  
C -1.59730700 -0.72034100 -0.95649900  
C -2.69411600 0.07552600 -0.90740800  
C -3.48142500 0.16564600 0.28710900  
H -0.98506700 -0.80614500 -1.84322200  
H -1.56484100 -2.02507300 2.08998900  
H -2.97693700 0.64446300 -1.77903700  
C -4.61876000 0.96868400 0.39483600  
H -5.19545900 1.01452400 1.31396700  
N -5.00554000 1.69931100 -0.67006700  
O -6.03045600 2.39366700 -0.50968400  
C -3.03055200 -0.63072400 1.38448200  
H -3.57143000 -0.62130700 2.32001200  
N -1.20085200 -1.46484600 0.12048100

**C1b**

E= -2121.55272

N 7.37599300 2.07253700 -2.93619900  
C 6.34488500 1.72064100 -1.97636400  
C 6.83965800 0.50669000 -1.17999500  
O 5.86594600 0.07007600 -0.21818500  
C 5.96548000 2.84324200 -1.02975600  
O 4.94475500 2.85974100 -0.37249200  
O 4.68876700 -1.22870300 -2.12471000  
P 4.62002200 -0.84455200 -0.69099200  
N 4.59181400 -1.99431200 0.50929900  
C 5.85130600 -2.67289000 0.83261600  
C 3.44752400 -2.91647900 0.46480700  
O 3.32930400 0.01951900 -0.29866900  
C 2.55739800 0.70174000 -1.33240100  
C 1.36246300 1.32087800 -0.64684300  
H 7.03796900 2.78111300 -3.57625300  
H 5.44487600 1.41511800 -2.51547500  
H 7.06432600 -0.28960500 -1.88623700  
H 7.73313700 0.75260700 -0.60854500  
H 6.68850400 3.67320700 -0.95823200

|   |             |             |             |   |             |             |             |
|---|-------------|-------------|-------------|---|-------------|-------------|-------------|
| H | 5.72687200  | -3.17564600 | 1.79185500  | N | -5.18108000 | 0.11574100  | 4.11044500  |
| H | 6.65322000  | -1.94417500 | 0.92084900  | C | -4.53641200 | 0.54087000  | 2.87571800  |
| H | 3.29191500  | -3.32062400 | 1.46590700  | C | -5.11298600 | -0.27132500 | 1.70636400  |
| H | 3.63723000  | -3.74602800 | -0.22371600 | O | -4.36206500 | -0.05949500 | 0.52370700  |
| H | 2.54780500  | -2.39239200 | 0.14506600  | C | -4.73618000 | 2.00562700  | 2.56426200  |
| H | 3.19218600  | 1.46098400  | -1.78712500 | O | -3.98501900 | 2.67752700  | 1.88797100  |
| H | 2.25477400  | -0.03608700 | -2.06892200 | O | -3.01364400 | -2.03640500 | 1.21490800  |
| H | 0.74832700  | 1.83940300  | -1.38452600 | P | -3.24389200 | -1.25522300 | -0.03873300 |
| H | 1.67886400  | 2.04135700  | 0.10905600  | N | -4.17633700 | -1.82926700 | -1.31061000 |
| H | 0.76093500  | 0.54322400  | -0.17668100 | C | -5.62319300 | -1.82554300 | -1.12301400 |
| C | 4.02901500  | 2.19967500  | 4.09657800  | C | -3.78954900 | -1.54597000 | -2.68920700 |
| N | 3.89459000  | 0.83347100  | 3.98407100  | O | -2.24473600 | -0.09997800 | -0.58740700 |
| C | 4.21626300  | 2.67065800  | 2.83450500  | C | -1.46070400 | 0.61303900  | 0.40278900  |
| C | 3.99119500  | 0.47424000  | 2.70650600  | C | -0.30007300 | 1.25973200  | -0.31980700 |
| N | 4.18518300  | 1.57941300  | 2.00019900  | H | -4.79131800 | 0.61662000  | 4.90065400  |
| H | 4.36558500  | 3.66697200  | 2.46097200  | H | -3.46751200 | 0.32675200  | 2.92253600  |
| H | 3.94509400  | -0.52580200 | 2.30333300  | H | -5.08699600 | -1.31675200 | 2.00698900  |
| H | 4.29973400  | 1.60550300  | 0.98821700  | H | -6.14925800 | 0.02087800  | 1.50956500  |
| H | 3.98034900  | 2.70355200  | 5.04412700  | H | -5.66641400 | 2.44388800  | 2.97029700  |
| H | 8.18679300  | 2.45989500  | -2.46481700 | H | -6.05604200 | -2.52624000 | -1.83909100 |
| H | 6.11538600  | -3.42065100 | 0.07823900  | H | -6.06565900 | -0.83645000 | -1.28122600 |
| H | 3.74544500  | 0.19217300  | 4.74984800  | H | -4.20310400 | -0.58951800 | -3.03133800 |
| C | -4.28398800 | -2.59526100 | 1.28824300  | H | -4.18012400 | -2.33464700 | -3.33595700 |
| C | -4.57128300 | -1.97026500 | -0.96618400 | H | -2.70805200 | -1.52604900 | -2.77709400 |
| C | -3.22894900 | -1.91342400 | -1.15910600 | H | -2.10163400 | 1.34925100  | 0.89034900  |
| C | -2.32503800 | -2.20740300 | -0.08949100 | H | -1.10948700 | -0.10139500 | 1.14647900  |
| H | -5.27756300 | -1.75589100 | -1.75574000 | H | 0.33200200  | 1.79098700  | 0.39355600  |
| H | -4.76379500 | -2.86907100 | 2.21672200  | H | -0.65654700 | 1.97339600  | -1.06393800 |
| H | -2.84249200 | -1.64905200 | -2.13074800 | H | 0.29501800  | 0.49551100  | -0.82126500 |
| C | -0.93157600 | -2.17515300 | -0.23183800 | C | -3.55753000 | 3.45451500  | -2.85381600 |
| H | -0.27324400 | -2.40473800 | 0.60178000  | N | -4.30505700 | 4.19721600  | -1.96853400 |
| N | -0.40833100 | -1.86886700 | -1.42894500 | C | -3.39032600 | 2.23261500  | -2.28054800 |
| O | 0.84240900  | -1.87122900 | -1.49989400 | C | -4.58465900 | 3.46392500  | -0.89398600 |
| C | -2.93017600 | -2.55311900 | 1.15468400  | N | -4.03841000 | 2.26845700  | -1.06700200 |
| H | -2.31540400 | -2.79450100 | 2.01008600  | H | -2.86226000 | 1.35832100  | -2.61237000 |
| N | -5.10879600 | -2.30717300 | 0.24372600  | H | -5.13381400 | 3.78863900  | -0.02953700 |
| C | -6.56050100 | -2.33241200 | 0.40281800  | H | -4.11451300 | 1.48301000  | -0.40103200 |
| H | -6.78805200 | -2.76535100 | 1.37265300  | H | -3.21421300 | 3.85401200  | -3.79017800 |
| H | -7.00287400 | -2.94758900 | -0.37589200 | H | -6.17134400 | 0.33933600  | 4.08652300  |
| C | -6.90815800 | -0.09279700 | 1.30898500  | H | -5.88086500 | -2.17139300 | -0.12269400 |
| C | -7.86586500 | -0.62302900 | -0.78145000 | C | 3.99352400  | -3.49698700 | -0.50615600 |
| C | -8.37620600 | 0.62872400  | -0.90397600 | C | 3.27667400  | -1.73896200 | 0.88397300  |
| C | -8.15923700 | 1.61136700  | 0.11470000  | C | 1.98544100  | -1.90036900 | 0.47888700  |
| H | -8.02009600 | -1.38434800 | -1.53265200 | C | 1.65259500  | -2.90000200 | -0.47285600 |
| H | -6.32788700 | -0.44605600 | 2.14983300  | H | 3.56769300  | -0.98635900 | 1.60294200  |
| H | -8.95210400 | 0.88243600  | -1.77995600 | H | 4.82814900  | -4.09070600 | -0.84987800 |
| C | -8.65302700 | 2.91519100  | 0.04432900  | H | 1.21601500  | -1.26529900 | 0.88981400  |
| H | -8.46956300 | 3.63456800  | 0.83696400  | C | 0.32445400  | -3.10259500 | -0.94570700 |
| N | -9.37166900 | 3.28550800  | -1.03512500 | H | 0.10574800  | -3.89158000 | -1.65919500 |
| O | -9.77959600 | 4.46489300  | -1.03595300 | N | -0.62367400 | -2.30549100 | -0.51141400 |
| C | -7.39219600 | 1.17383100  | 1.24091900  | O | -1.79068600 | -2.53302900 | -0.97946600 |
| H | -7.19215900 | 1.85340400  | 2.05719800  | C | 2.71531800  | -3.70352400 | -0.94652100 |
| N | -7.13321700 | -0.99656000 | 0.31057700  | H | 2.53296200  | -4.48621200 | -1.66870500 |
|   |             |             |             | N | 4.27344200  | -2.52450400 | 0.39449000  |
|   |             |             |             | C | 5.65360700  | -2.31341000 | 0.85795300  |
|   |             |             |             | H | 6.28151800  | -3.05893600 | 0.37925600  |
|   |             |             |             | H | 5.69783300  | -2.44513100 | 1.93513300  |

**TS1b**

E= -2121.53768

C 6.35608800 -0.64783600 -0.77519300  
C 6.29394000 -0.03775800 1.50718800  
C 6.69405200 1.22511800 1.21551400  
C 6.94565100 1.62054400 -0.13856100  
H 6.10440700 -0.36407300 2.51978100  
H 6.20697200 -1.43415600 -1.50179700  
H 6.82453700 1.93677700 2.01540500  
C 7.35249200 2.90355600 -0.50184900  
H 7.53674600 3.16918300 -1.53851700  
N 7.51788300 3.83517600 0.46151500  
O 7.87859800 4.96133800 0.06702400  
C 6.75672900 0.60010600 -1.12552100  
H 6.93649100 0.81650200 -2.16897500  
N 6.11804800 -0.97978800 0.52967000  
H -4.59556700 5.15555700 -2.09872800

**INb**

E= -2121.53822

N -5.17910100 0.16218900 4.10308900  
C -4.53228900 0.58409900 2.86717800  
C -5.06402800 -0.27236500 1.70677900  
O -4.30504400 -0.07099300 0.53524400  
C -4.78834800 2.03121900 2.52372500  
O -4.04392300 2.73523800 1.87301000  
O -2.95268900 -2.01313600 1.27377500  
P -3.15224100 -1.29430700 -0.02857900  
N -4.15536600 -1.87204100 -1.25910500  
C -5.59401200 -1.84771400 -1.03060200  
C -3.81760900 -1.59023200 -2.65126200  
O -2.21324600 -0.07345900 -0.58048300  
C -1.49173800 0.70367900 0.40284900  
C -0.34386000 1.38362600 -0.31169900  
H -4.84146100 0.71349000 4.88384700  
H -3.45685700 0.41211100 2.93105300  
H -5.01173100 -1.30791400 2.03753800  
H -6.10920200 -0.01712300 1.49704100  
H -5.75924200 2.42379500 2.87984500  
H -6.05579600 -2.54691400 -1.73083300  
H -6.03077300 -0.85473700 -1.18187700  
H -4.24037700 -0.63222900 -2.97912300  
H -4.23307700 -2.37670700 -3.28565400  
H -2.73997700 -1.57012000 -2.78090500  
H -2.17357300 1.42382500 0.85684100  
H -1.12232800 0.03146200 1.17779200  
H 0.24939000 1.96077700 0.39939600  
H -0.71519000 2.06125300 -1.08193800  
H 0.29550700 0.63550900 -0.78232100  
C -3.65890100 3.36391200 -2.89525100  
N -4.46305600 4.07403000 -2.03338700  
C -3.44025000 2.15774800 -2.30550300  
C -4.72628300 3.33519800 -0.95775600  
N -4.11508000 2.16859500 -1.10613100  
H -2.85941300 1.30962700 -2.61664400  
H -5.31003900 3.64104700 -0.10928000  
H -4.16192900 1.38002500 -0.42947400  
H -3.31717000 3.77263900 -3.82822000

H -6.18025400 0.32340800 4.04752000  
H -5.82744000 -2.18515000 -0.02178200  
C 3.96387700 -3.48007000 -0.52415300  
C 3.29731600 -1.70094400 0.86141500  
C 1.99501700 -1.84557900 0.47682100  
C 1.63870000 -2.84666600 -0.45633000  
H 3.61242400 -0.94672800 1.56787600  
H 4.78375900 -4.08893100 -0.87622300  
H 1.24113200 -1.19394300 0.89123100  
C 0.28682400 -3.03491700 -0.90676000  
H 0.05069500 -3.82358400 -1.61514500  
N -0.63069200 -2.23543200 -0.45295700  
O -1.82394900 -2.46018600 -0.90831900  
C 2.67240800 -3.66889400 -0.94414500  
H 2.46502600 -4.45323000 -1.65768200  
N 4.26902200 -2.50716700 0.36284800  
C 5.66308900 -2.32092700 0.81119200  
H 6.27158100 -3.06871200 0.31173700  
H 5.71532800 -2.47213500 1.88536100  
C 6.38576300 -0.65058300 -0.80576500  
C 6.32351300 -0.05918100 1.48321800  
C 6.73817800 1.20108800 1.20345300  
C 6.99846700 1.60553000 -0.14691700  
H 6.12800800 -0.39231100 2.49244600  
H 6.23147500 -1.42950800 -1.53928000  
H 6.87483100 1.90404700 2.00993800  
C 7.42224300 2.88577500 -0.49697500  
H 7.61292300 3.15939300 -1.53034100  
N 7.59820200 3.80589300 0.47674500  
O 7.97544800 4.92997300 0.09409100  
C 6.80065900 0.59564900 -1.14365300  
H 6.98644700 0.81905700 -2.18457900  
N 6.13983900 -0.99142200 0.49630700  
H -4.80066400 5.01439600 -2.17902100

**TS2b**

E= -2121.53310

N 3.75047900 4.63486200 -0.93692900  
C 3.73021300 3.37503900 -0.20215700  
C 4.07021900 2.23478500 -1.17075400  
O 3.94835100 0.97689700 -0.54316500  
C 4.72877000 3.34579200 0.92922500  
O 4.52660700 2.86661500 2.02549100  
O 1.78572400 0.67206500 -1.74335800  
P 2.59528200 -0.35684900 -1.01596000  
N 3.86035200 -1.25536900 -1.67343200  
C 4.43856700 -0.73857700 -2.91010200  
C 3.87031700 -2.71371700 -1.61112600  
O 2.51518300 -0.64708900 0.57008700  
C 2.07070100 0.38882400 1.47370900  
C 1.38308200 -0.29417400 2.63655500  
H 3.52043800 5.40602000 -0.32059000  
H 2.73386600 3.19528600 0.20340400  
H 3.37425800 2.29335500 -2.00475800  
H 5.09364000 2.36057300 -1.54645200  
H 5.71250600 3.78929200 0.68324500

H 3.87678600 -1.06760800 -3.79166200  
H 5.46436400 -1.10229600 -3.00541800  
H 4.90431800 -3.04537000 -1.73278700  
H 3.26070600 -3.17451800 -2.39373500  
H 3.51352200 -3.05101300 -0.64111400  
H 2.93462000 0.96898300 1.79114600  
H 1.38258300 1.05090400 0.94547400  
H 1.03777300 0.45075500 3.35511700  
H 2.07338100 -0.97048700 3.14240100  
H 0.52660300 -0.86958300 2.28309200  
C 7.70392100 -1.26139100 1.00767600  
N 7.50201900 -0.36703200 2.03115000  
C 6.73302600 -0.99612100 0.08781400  
C 6.44792900 0.40344700 1.72981200  
N 5.96332400 0.04337100 0.55342900  
H 6.53044000 -1.46931300 -0.85569300  
H 6.06643200 1.19456200 2.35278400  
H 4.95051200 0.52129200 -0.01526200  
H 8.49740300 -1.98612800 1.02704600  
H 4.68318700 4.81730400 -1.29491900  
H 4.46238200 0.34799300 -2.89650600  
C -4.07018400 -3.25829200 0.07920600  
C -3.47890700 -1.19076200 1.02784000  
C -2.23449600 -1.24954400 0.46110000  
C -1.87796800 -2.35888100 -0.32970900  
H -3.79849500 -0.36113300 1.64103200  
H -4.83450500 -4.01320000 -0.03036800  
H -1.53342000 -0.44513200 0.62394700  
C -0.56574000 -2.47613400 -0.94326000  
H -0.33506100 -3.33020900 -1.57325200  
N 0.29689600 -1.55421400 -0.70790100  
O 1.46575200 -1.75502700 -1.30226600  
C -2.83374400 -3.36762000 -0.51246800  
H -2.61788100 -4.23972300 -1.11254500  
N -4.37793000 -2.18554100 0.83584200  
C -5.70467500 -2.09402900 1.48936300  
H -5.56048100 -2.06275500 2.56521400  
H -6.26118700 -2.98724000 1.22334500  
C -6.58346200 0.14833900 1.91880000  
C -6.91178800 -0.83444400 -0.20893900  
C -7.55937900 0.26762600 -0.65587700  
C -7.74972800 1.40546300 0.19848300  
H -6.75593900 -1.70670600 -0.82818400  
H -6.18733800 0.02579800 2.91664300  
H -7.93923400 0.28625600 -1.66511700  
C -8.40181500 2.56619900 -0.20923100  
H -8.53376900 3.41113200 0.45982800  
N -8.88022000 2.63799600 -1.47162900  
O -9.44962900 3.70393500 -1.77193600  
C -7.22593900 1.27669400 1.52453100  
H -7.33967400 2.08445400 2.23320200  
N -6.41373200 -0.90890000 1.06723000  
H 8.05028200 -0.29534900 2.87475400

N 4.06440200 4.94697100 -1.14793900  
C 3.88457100 3.73484300 -0.34872800  
C 5.08231900 2.81711100 -0.54304800  
O 4.88569100 1.69581200 0.28801300  
C 3.75781500 4.07109500 1.12062400  
O 2.78866100 3.83571300 1.80888400  
O 2.07112800 0.95220600 -1.19423400  
P 2.49475200 -0.38970700 -0.73763100  
N 3.89443000 -0.96442300 -1.34770700  
C 4.58745200 -0.27913600 -2.42957800  
C 4.35039100 -2.31819100 -1.05327000  
O 2.48949300 -0.66155500 0.83143500  
C 2.32705100 0.44553200 1.76957800  
C 0.85958400 0.71930700 2.01359900  
H 3.25079100 5.54542600 -1.06217900  
H 2.98330400 3.20866700 -0.66288100  
H 5.14615800 2.55287700 -1.60268700  
H 6.00141800 3.35836800 -0.27545700  
H 4.62829700 4.61306100 1.54031500  
H 5.63115000 -0.12682700 -2.14672200  
H 4.12003900 0.68646900 -2.60304300  
H 5.43362100 -2.30602100 -0.92577100  
H 4.08942800 -3.00391200 -1.86421000  
H 3.90293200 -2.67243700 -0.12638600  
H 2.82646600 0.10782600 2.67527100  
H 2.84442000 1.31469200 1.37776600  
H 0.76007500 1.50865900 2.76081400  
H 0.35474300 -0.17666700 2.37732400  
H 0.37935000 1.04977000 1.09202900  
C 7.15583000 -2.24446100 1.53298800  
N 8.03266300 -2.14745800 0.48247200  
C 6.40221600 -1.10420800 1.47928500  
C 7.78938100 -0.98105200 -0.15537400  
N 6.80696100 -0.32225900 0.42267000  
H 5.59246100 -0.80388100 2.12466900  
H 8.34595000 -0.66153300 -1.02086000  
H 5.62788200 1.05878100 0.18152800  
H 7.14827200 -3.08931400 2.19831400  
H 4.85683700 5.48037200 -0.80264400  
H 4.54546600 -0.86948800 -3.34897200  
C -4.14315400 -3.34745300 -0.39055500  
C -3.66656200 -1.43821900 0.89491400  
C -2.38209700 -1.39589500 0.41471800  
C -1.95754700 -2.36916500 -0.50139100  
H -4.04575100 -0.71653600 1.60285700  
H -4.88151600 -4.08470100 -0.66861100  
H -1.71127200 -0.61892900 0.74900800  
C -0.59107700 -2.37673000 -1.03713800  
H -0.29191100 -3.14435300 -1.74436500  
N 0.20999500 -1.47041400 -0.64168800  
O 1.44860900 -1.60574400 -1.22202800  
C -2.86290800 -3.35194600 -0.90324200  
H -2.58516700 -4.12018800 -1.61024800  
N -4.52164100 -2.40451100 0.49137100  
C -5.89670900 -2.43253900 1.05940400  
H -5.81742400 -2.57769400 2.13233100  
H -6.41226500 -3.27861600 0.61573400

C2b

E= -2121.55976

C -6.86383600 -0.30632900 1.78711600  
C -6.99896500 -0.92023300 -0.49638300  
C -7.63930400 0.23217700 -0.80289200  
C -7.92529200 1.20756600 0.21149400  
H -6.77544100 -1.67206500 -1.24012800  
H -6.54760900 -0.58960100 2.78093300  
H -7.94123600 0.41575000 -1.82201400  
C -8.57516000 2.41009100 -0.04765400  
H -8.78171000 3.12836300 0.73984600  
N -8.95815500 2.68625900 -1.31568300  
O -9.53428400 3.77754900 -1.47652200  
C -7.50362900 0.86281300 1.53578000  
H -7.69617400 1.53657500 2.35841800  
N -6.59704600 -1.20250800 0.78608200  
H 8.73926800 -2.82060500 0.23157800

**Obidoxime**

E= -983.51304

C 2.70794000 -0.57559400 -1.15717600  
C 2.86610800 -1.36914300 1.05686600  
C 3.86036500 -0.48354400 1.33294900  
C 4.33622300 0.42212200 0.33545900  
C 5.36276600 1.33006300 0.61558100  
N 5.78157400 2.16377800 -0.35429100  
O 6.69893200 2.95185900 -0.03820700  
C 3.69501000 0.33098800 -0.94158500  
N 2.29927400 -1.43647600 -0.17933100  
C -2.70358200 -0.53550600 -1.19440000  
C -2.86486100 -1.39394800 0.99502200  
C -3.86120500 -0.51881600 1.29503600  
C -4.33719100 0.41476200 0.32335000  
C -5.36661000 1.31103900 0.62864200  
N -5.78738300 2.17182800 -0.31655300  
O -6.70827400 2.94616800 0.02213200  
C -3.69323500 0.36231000 -0.95428200  
N -2.29515200 -1.42391500 -0.24158600  
C 1.17258800 -2.30998300 -0.42249000  
C -1.16576100 -2.28839800 -0.50220000  
H 2.48146300 -2.06165800 1.79142100  
H 2.19727300 -0.66726700 -2.10502500  
H 4.29016100 -0.47298800 2.32452500  
H 5.82602200 1.37520500 1.59704200  
H 3.99886000 0.98779200 -1.74135100  
H -2.48016600 -2.10698100 1.70971900  
H -2.19157600 -0.59851500 -2.14379700  
H -4.29324900 -0.53869400 2.28550100  
H -5.83151600 1.32524600 1.61025800  
H -3.99704100 1.04116200 -1.73542300  
H 1.22688100 -3.15187100 0.26891900  
H 1.22332900 -2.67379400 -1.45025300  
H -1.18679000 -2.59066400 -1.55067400  
H -1.24476300 -3.16922200 0.13630000  
O 0.00204000 -1.54832200 -0.21135900

**C1c**

E= -2235.75293

N -6.77383900 1.52710300 3.36031100  
C -5.66320400 1.44457800 2.42657600  
C -6.23135300 1.14687900 1.03293400  
O -5.18424400 0.91606000 0.07577600  
C -4.81931400 2.69810900 2.35395600  
O -3.68828300 2.72157500 1.91340000  
O -4.86676000 -1.41148300 1.10391500  
P -4.58651500 -0.60862900 -0.11190900  
N -5.18887400 -1.19180100 -1.53186000  
C -6.64810200 -1.16183100 -1.63440200  
C -4.48920900 -1.00978500 -2.80060100  
O -3.06775300 -0.27539000 -0.45390100  
C -2.11904800 -0.22925300 0.65769300  
C -0.75804100 0.07257400 0.07642400  
H -6.42933700 1.59068600 4.31083400  
H -5.01802500 0.60668000 2.69494100  
H -6.87640500 0.27510900 1.12366500  
H -6.81412100 1.98590300 0.65337400  
H -5.30496300 3.62426900 2.70691500  
H -6.96030200 -1.89366800 -2.37952500  
H -7.01843700 -0.17416200 -1.92885100  
H -4.66365000 -0.01605600 -3.22790600  
H -4.86768000 -1.75435100 -3.50200200  
H -3.42680600 -1.17991300 -2.65588500  
H -2.44598900 0.54730100 1.35053800  
H -2.13553800 -1.19990000 1.14732800  
H -0.01629900 0.07463000 0.87664800  
H -0.74566200 1.04752000 -0.41165800  
H -0.48610100 -0.69440800 -0.64899500  
C -1.73348500 3.47841400 -2.50254800  
N -1.67779400 4.31645100 -1.41160100  
C -2.59269100 2.47766300 -2.17225500  
C -2.46794800 3.85347100 -0.44772400  
N -3.03167800 2.73865200 -0.89465100  
H -2.91174200 1.61123600 -2.72087300  
H -2.62215500 4.28641100 0.52367200  
H -3.69201600 2.16945400 -0.36316400  
H -1.16738300 3.66241300 -3.39689800  
H -7.32394500 2.36279400 3.18939600  
H -7.09456500 -1.44386300 -0.68024300  
C 3.12042500 -3.79091400 -0.67614200  
C 2.11412400 -3.14099200 1.35392800  
C 0.87830600 -3.16613500 0.78972900  
C 0.71155300 -3.51851300 -0.58696300  
H 2.27589000 -2.87160500 2.38759000  
H 4.04690700 -4.01375900 -1.18547900  
H 0.01599700 -2.91749200 1.38872600  
C -0.53418600 -3.56023500 -1.22450000  
H -0.62494800 -3.82823200 -2.27337500  
N -1.64070500 -3.26850300 -0.51740100  
O -2.72061700 -3.32923200 -1.14446700  
C 1.91128600 -3.83033700 -1.29673900  
H 1.86788100 -4.10391100 -2.34152100  
N 3.23152400 -3.46562100 0.64188600  
C 7.33189400 -0.48375800 -0.40150300  
C 6.49343500 0.60194800 1.51562900



|   |             |             |             |
|---|-------------|-------------|-------------|
| C | 6.79557100  | 1.82164100  | 1.00035000  |
| C | 7.40661200  | 1.93897100  | -0.28901700 |
| H | 6.02650900  | 0.47765500  | 2.48197100  |
| H | 7.50329900  | -1.43054800 | -0.89298100 |
| H | 6.57278300  | 2.71023600  | 1.56973700  |
| C | 7.74759800  | 3.16483500  | -0.86949500 |
| H | 8.21063500  | 3.21604700  | -1.85073600 |
| N | 7.49841300  | 4.30211200  | -0.19434800 |
| O | 7.83008800  | 5.36109400  | -0.76971500 |
| C | 7.65674200  | 0.70776000  | -0.96976100 |
| H | 8.11192400  | 0.71282700  | -1.95006700 |
| N | 6.77054300  | -0.55011700 | 0.83807200  |
| H | -1.12293100 | 5.15759800  | -1.34010800 |
| C | 4.54524800  | -3.32940900 | 1.23215600  |
| H | 4.45487200  | -3.43210300 | 2.31406000  |
| H | 5.19201900  | -4.11634200 | 0.83984100  |
| C | 6.33524400  | -1.82546600 | 1.36249400  |
| H | 7.02309600  | -2.59968800 | 1.01887700  |
| H | 6.34640600  | -1.78026900 | 2.45238800  |
| O | 5.02965000  | -2.05240900 | 0.87302100  |

**TS1c**

E= -2235.74171

|   |             |             |             |
|---|-------------|-------------|-------------|
| N | -5.31493800 | 0.30945100  | 4.20961300  |
| C | -4.59914200 | 0.53601400  | 2.95218200  |
| C | -5.44160600 | 0.05262300  | 1.78454900  |
| O | -4.72752100 | 0.17608500  | 0.55943400  |
| C | -4.25101800 | 2.00351500  | 2.83328700  |
| O | -4.66505600 | 2.74312400  | 1.96447400  |
| O | -3.60077700 | -1.96323100 | 1.14364800  |
| P | -3.79614600 | -1.11836100 | -0.07313400 |
| N | -4.82568700 | -1.55258600 | -1.32411000 |
| C | -6.25537900 | -1.37939500 | -1.08660700 |
| C | -4.45244300 | -1.28151000 | -2.70962700 |
| O | -2.68476000 | -0.08719700 | -0.65403900 |
| C | -1.81417300 | 0.55836700  | 0.30288300  |
| C | -0.55505500 | 0.96778100  | -0.42868400 |
| H | -4.70251600 | 0.45209900  | 5.00431600  |
| H | -3.67569600 | -0.04754600 | 2.97172600  |
| H | -5.71663900 | -0.98301300 | 1.97257700  |
| H | -6.34663400 | 0.65655400  | 1.69303000  |
| H | -3.63271200 | 2.40253800  | 3.65578000  |
| H | -6.79243700 | -2.00120900 | -1.80492000 |
| H | -6.57836700 | -0.33950000 | -1.20507200 |
| H | -4.74972300 | -0.27076300 | -3.01534300 |
| H | -4.96491000 | -1.99580600 | -3.35767100 |
| H | -3.38141400 | -1.39945500 | -2.83643800 |
| H | -2.33434000 | 1.42338000  | 0.72011600  |
| H | -1.59267900 | -0.14197800 | 1.10817900  |
| H | 0.13700400  | 1.45189200  | 0.26201100  |
| H | -0.78875500 | 1.66779700  | -1.23219800 |
| H | -0.07585800 | 0.08673000  | -0.85617400 |
| C | -3.81805800 | 3.70244200  | -2.68982400 |
| N | -4.58403500 | 4.44735700  | -1.82214600 |
| C | -3.70837200 | 2.46508800  | -2.13545900 |
| C | -4.92859900 | 3.70029000  | -0.77581400 |

|   |             |             |             |
|---|-------------|-------------|-------------|
| N | -4.40717800 | 2.49458000  | -0.94996900 |
| H | -3.19317700 | 1.58132700  | -2.46383200 |
| H | -5.51096800 | 4.01868700  | 0.06857800  |
| H | -4.52962100 | 1.69900300  | -0.29706300 |
| H | -3.42433400 | 4.11070500  | -3.60223300 |
| H | -6.08280400 | 0.96626600  | 4.30338400  |
| H | -6.52253800 | -1.71998100 | -0.08707300 |
| C | 3.13147700  | -4.19317300 | -0.75560600 |
| C | 2.60807400  | -2.49153800 | 0.78282900  |
| C | 1.31172900  | -2.46198100 | 0.36295800  |
| C | 0.87460800  | -3.33290500 | -0.66995000 |
| H | 2.98982000  | -1.84354300 | 1.55837600  |
| H | 3.89875800  | -4.84086100 | -1.15273600 |
| H | 0.61585300  | -1.77781600 | 0.82382900  |
| C | -0.46561700 | -3.34593600 | -1.15102900 |
| H | -0.77030500 | -4.05061100 | -1.91933500 |
| N | -1.32172800 | -2.48336600 | -0.65197600 |
| O | -2.50723800 | -2.54909400 | -1.11953300 |
| C | 1.84311000  | -4.20896600 | -1.21433000 |
| H | 1.57819800  | -4.89720600 | -2.00410800 |
| N | 3.50679700  | -3.35224900 | 0.23555700  |
| C | 7.72123300  | -0.04778500 | -0.47537000 |
| C | 6.26945600  | 0.63956600  | 1.25167800  |
| C | 6.43212800  | 1.94505300  | 0.91857100  |
| C | 7.28530400  | 2.32041400  | -0.16896400 |
| H | 5.62845400  | 0.31911500  | 2.06065400  |
| H | 8.18451800  | -0.88360100 | -0.97922200 |
| H | 5.91405800  | 2.70647800  | 1.48004700  |
| C | 7.49523900  | 3.64767300  | -0.55533900 |
| H | 8.14931600  | 3.89909100  | -1.38532300 |
| N | 6.87160900  | 4.63189600  | 0.11957300  |
| O | 7.10150400  | 5.79453100  | -0.27649900 |
| C | 7.92492100  | 1.24209600  | -0.85484700 |
| H | 8.58099400  | 1.44376900  | -1.68968100 |
| N | 6.91615600  | -0.35807500 | 0.57844000  |
| H | -4.84432700 | 5.41523900  | -1.94509500 |
| C | 4.88805900  | -3.30129100 | 0.69947100  |
| H | 4.89596700  | -3.38015600 | 1.78865000  |
| H | 5.42733900  | -4.14114000 | 0.26270200  |
| O | 5.40181700  | -2.06187400 | 0.27793600  |
| C | 6.62726200  | -1.73551400 | 0.90608700  |
| H | 7.44117100  | -2.36085800 | 0.54049500  |
| H | 6.54196200  | -1.83360600 | 1.98957000  |

**INc**

E= -2235.74273

|   |             |             |             |
|---|-------------|-------------|-------------|
| N | -6.34120500 | -1.30583800 | 3.46185500  |
| C | -5.43868400 | -0.58902000 | 2.55588400  |
| C | -5.96489000 | -0.64782100 | 1.13236700  |
| O | -5.04730900 | -0.05174300 | 0.23321000  |
| C | -5.28010500 | 0.83321300  | 3.04515200  |
| O | -5.65137500 | 1.81808900  | 2.44019800  |
| O | -3.84696600 | -2.20667100 | 0.25994700  |
| P | -3.84317100 | -1.00455900 | -0.64063900 |
| N | -4.66490000 | -0.94344600 | -2.11775200 |
| C | -4.12240400 | -0.12814500 | -3.20112600 |

|   |             |             |             |
|---|-------------|-------------|-------------|
| C | -6.12075500 | -0.90337500 | -2.08625200 |
| O | -2.82394000 | 0.27483900  | -0.51175300 |
| C | -2.31396700 | 0.60376100  | 0.79437800  |
| C | -1.00756800 | 1.34408700  | 0.60088700  |
| H | -5.91923800 | -1.41660200 | 4.37687200  |
| H | -4.46522400 | -1.08393400 | 2.57585200  |
| H | -6.13470900 | -1.69360300 | 0.88399600  |
| H | -6.90960000 | -0.10221200 | 1.05676000  |
| H | -4.86039600 | 0.93201100  | 4.06147000  |
| H | -4.47357200 | 0.90943600  | -3.13535100 |
| H | -4.45660100 | -0.53770600 | -4.15724300 |
| H | -6.48536100 | -1.20698300 | -3.06982700 |
| H | -6.51302800 | 0.09343900  | -1.85646800 |
| H | -6.50840000 | -1.61005900 | -1.35439800 |
| H | -3.04684100 | 1.21938200  | 1.31991900  |
| H | -2.16069000 | -0.31540800 | 1.36177800  |
| H | -0.57746900 | 1.60571900  | 1.56890600  |
| H | -1.16863800 | 2.26269500  | 0.03450100  |
| H | -0.30200600 | 0.71604400  | 0.05571400  |
| C | -4.19480200 | 4.44067600  | -1.32627900 |
| N | -5.25211700 | 4.71220000  | -0.48807100 |
| C | -3.95383100 | 3.10614900  | -1.21438600 |
| C | -5.64178300 | 3.59067200  | 0.11557000  |
| N | -4.86675200 | 2.60619400  | -0.31382400 |
| H | -3.21780800 | 2.47482400  | -1.67721500 |
| H | -6.43236500 | 3.50029800  | 0.83699700  |
| H | -4.95763800 | 1.60399600  | -0.02336800 |
| H | -3.71657300 | 5.20432200  | -1.91142300 |
| H | -7.19877400 | -0.77931300 | 3.59287700  |
| H | -3.03746500 | -0.13983200 | -3.17554600 |
| C | 3.19388200  | -3.39496300 | -0.96221200 |
| C | 2.31055400  | -2.36474600 | 0.95911000  |
| C | 1.10117200  | -2.18611100 | 0.34703100  |
| C | 0.91041000  | -2.62691600 | -0.98096000 |
| H | 2.50848000  | -2.04183000 | 1.97048500  |
| H | 4.06099200  | -3.85299600 | -1.41438000 |
| H | 0.29375900  | -1.71352900 | 0.88532000  |
| C | -0.34286400 | -2.47040800 | -1.67265500 |
| H | -0.45639700 | -2.83996800 | -2.68758800 |
| N | -1.31773600 | -1.88118800 | -1.05322500 |
| O | -2.41845400 | -1.78079200 | -1.73710900 |
| C | 2.00380600  | -3.24033300 | -1.62369500 |
| H | 1.91823200  | -3.59649500 | -2.64012400 |
| N | 3.33561400  | -2.97308100 | 0.31367100  |
| C | 4.63599800  | -3.07931700 | 0.96708600  |
| H | 5.14227800  | -3.96658800 | 0.58499400  |
| H | 4.47394400  | -3.17804500 | 2.04096900  |
| C | 7.92218900  | -0.62648800 | -0.38539600 |
| C | 7.09138700  | 0.49854800  | 1.51377600  |
| C | 7.59264000  | 1.68146300  | 1.07600900  |
| C | 8.31067600  | 1.75830300  | -0.16051700 |
| H | 6.54010900  | 0.40678700  | 2.43846200  |
| H | 8.00245700  | -1.57060200 | -0.90474200 |
| H | 7.44820200  | 2.57195700  | 1.66732900  |
| C | 8.85475900  | 2.94523800  | -0.66002600 |
| H | 9.39321500  | 2.96834500  | -1.60294900 |
| N | 8.70622200  | 4.08180200  | 0.04646100  |

|   |             |             |             |
|---|-------------|-------------|-------------|
| O | 9.21560600  | 5.10589300  | -0.45622700 |
| C | 8.44594500  | 0.52777000  | -0.87515000 |
| H | 8.97201000  | 0.50382200  | -1.81893200 |
| N | 7.26249500  | -0.65749100 | 0.80705300  |
| H | -5.67103100 | 5.61882800  | -0.33942800 |
| C | 6.62033200  | -1.87513600 | 1.24260300  |
| H | 6.54768000  | -1.86741100 | 2.33056400  |
| H | 7.21690000  | -2.72784300 | 0.91663500  |
| O | 5.33433700  | -1.90201900 | 0.64895800  |

**TS2c**

E= -2235.73497

|   |             |             |             |
|---|-------------|-------------|-------------|
| N | 3.45177100  | 4.75680500  | -0.52510400 |
| C | 3.66890000  | 3.45765100  | 0.10001500  |
| C | 4.19794600  | 2.48059100  | -0.95934300 |
| O | 4.28047000  | 1.16867300  | -0.44845100 |
| C | 4.67057700  | 3.50775000  | 1.22809500  |
| O | 4.59338700  | 2.87029200  | 2.25762600  |
| O | 2.16788500  | 0.65800400  | -1.66121800 |
| P | 3.12323600  | -0.30114400 | -1.01983000 |
| N | 4.49406500  | -0.95794800 | -1.75092100 |
| C | 4.96648900  | -0.26674000 | -2.94687900 |
| C | 4.69992200  | -2.40195200 | -1.81367600 |
| O | 3.11319700  | -0.72724100 | 0.53786300  |
| C | 2.49190800  | 0.13372700  | 1.51749200  |
| C | 1.98577800  | -0.75245400 | 2.63546900  |
| H | 3.10078500  | 5.42096700  | 0.15554600  |
| H | 2.72602500  | 3.06451700  | 0.48176300  |
| H | 3.50627200  | 2.50306700  | -1.79858100 |
| H | 5.18966400  | 2.80378900  | -1.30034400 |
| H | 5.53752100  | 4.17043100  | 1.04297300  |
| H | 4.41580200  | -0.57447700 | -3.84302700 |
| H | 6.02244500  | -0.50111300 | -3.09983200 |
| H | 5.76709100  | -2.58050900 | -1.96579300 |
| H | 4.14618000  | -2.87339900 | -2.63066800 |
| H | 4.40470900  | -2.86398700 | -0.87484600 |
| H | 3.22941900  | 0.85412200  | 1.86605300  |
| H | 1.66972800  | 0.67388600  | 1.04569200  |
| H | 1.51839600  | -0.14404100 | 3.41132200  |
| H | 2.81053100  | -1.30981400 | 3.08153300  |
| H | 1.25193200  | -1.46184800 | 2.25081300  |
| C | 8.40050900  | -0.54272200 | 0.81914200  |
| N | 8.10145500  | 0.23109700  | 1.91460900  |
| C | 7.35798600  | -0.37963000 | -0.04462400 |
| C | 6.92308700  | 0.83471900  | 1.70864900  |
| N | 6.45082400  | 0.48205600  | 0.52516500  |
| H | 7.19220600  | -0.81238000 | -1.01451200 |
| H | 6.44540800  | 1.50453300  | 2.40335300  |
| H | 5.35716500  | 0.83100200  | 0.02565000  |
| H | 9.30187400  | -1.12479000 | 0.75628200  |
| H | 4.33041200  | 5.13149500  | -0.86979300 |
| H | 4.87064700  | 0.80970400  | -2.82834400 |
| C | -3.15680600 | -4.04672400 | -0.30171200 |
| C | -2.79281500 | -2.05888800 | 0.90056700  |
| C | -1.53666700 | -1.92957400 | 0.37149900  |
| C | -1.05882200 | -2.89631100 | -0.53338800 |

H -3.21978400 -1.34558200 1.59022600  
H -3.84604200 -4.84610800 -0.52838000  
H -0.92266200 -1.08565300 0.64690200  
C 0.26295100 -2.80332300 -1.13382900  
H 0.59014200 -3.55982900 -1.84135200  
N 1.00964300 -1.81137400 -0.80874200  
O 2.19194000 -1.81319700 -1.41572600  
C -1.90206200 -3.96673300 -0.85985000  
H -1.58651100 -4.73294000 -1.55303500  
N -3.58005800 -3.10812300 0.56540200  
C -6.58114700 0.68335900 1.44533900  
C -8.16177000 -0.30018200 -0.00423700  
C -8.51773800 0.91416300 -0.49606400  
C -7.89321600 2.10947700 -0.01535100  
H -8.60854400 -1.22116000 -0.34970600  
H -5.82666700 0.50827500 2.19913800  
H -9.27883800 0.97725500 -1.25777700  
C -8.21725500 3.38665300 -0.48103900  
H -7.72219900 4.27299300 -0.09501800  
N -9.16480300 3.51703200 -1.42955400  
O -9.40406200 4.68506600 -1.80204500  
C -6.89393800 1.92493100 0.99127300  
H -6.37608500 2.77914800 1.40372900  
N -7.21381600 -0.42742800 0.97042200  
H 8.66898000 0.33513600 2.74192800  
C -4.92927700 -3.16938800 1.14256000  
H -4.83857000 -3.15177800 2.23011300  
H -5.39332500 -4.10003100 0.81994000  
C -6.77304000 -1.73192900 1.40346000  
H -7.56426300 -2.45412500 1.20811900  
H -6.55118200 -1.69950000 2.47117600  
O -5.60278700 -2.03831500 0.66268200

### C2c

E= -2235.76384

N 2.55786400 4.41456100 -0.47154800  
C 3.07735300 3.39881000 0.44449300  
C 4.47735900 2.99466900 0.00434500  
O 5.02424600 2.16684000 1.00949100  
C 3.14459400 3.92177600 1.86191900  
O 2.55139200 3.45084400 2.80756700  
O 2.62918500 0.31456300 -0.71448500  
P 3.14425300 -0.95220200 -0.15156600  
N 4.67018800 -1.36439700 -0.59647700  
C 5.10820500 -1.02167700 -1.95082800  
C 5.26496400 -2.59317800 -0.06958700  
O 3.06524500 -1.14566300 1.42272500  
C 2.79620500 -0.00031600 2.29414100  
C 1.30678500 0.24234800 2.39427600  
H 1.60545600 4.65568600 -0.22169000  
H 2.43013900 2.52272800 0.42263000  
H 4.40166600 2.48238800 -0.95849700  
H 5.08463000 3.90156200 -0.13491100  
H 3.76637500 4.83048100 1.98317900  
H 6.19464500 -0.93074600 -1.94375100  
H 4.67472800 -0.06757300 -2.24149000

H 6.34975000 -2.48879300 -0.10387300  
H 4.97138000 -3.46518500 -0.66138200  
H 4.95930600 -2.73754900 0.96442200  
H 3.21867200 -0.29134100 3.25304900  
H 3.33451100 0.86519200 1.91508400  
H 1.12810600 1.08107800 3.06759200  
H 0.79837200 -0.64350500 2.77745800  
H 0.89811100 0.49117300 1.41427200  
C 8.81269700 -0.36357500 -1.01007400  
N 8.58967100 0.59411300 -1.96708400  
C 7.99282500 -0.02798100 0.03328500  
C 7.66707600 1.45530100 -1.48487300  
N 7.28339800 1.10895800 -0.27369500  
H 7.87392900 -0.53174900 0.97827500  
H 7.31082700 2.30421000 -2.04487600  
H 5.85323100 1.77827300 0.64449500  
H 9.51408700 -1.16625900 -1.15262200  
H 3.10452200 5.26721100 -0.39471300  
H 4.81814100 -1.79144600 -2.67293100  
C -3.30255200 -4.26990200 -0.47638900  
C -3.07499500 -2.31111900 0.80397200  
C -1.73685200 -2.23397100 0.50875100  
C -1.15779000 -3.21312100 -0.31085300  
H -3.58838800 -1.58809700 1.41959000  
H -3.97340200 -5.03605700 -0.83408100  
H -1.14530800 -1.42427300 0.90906100  
C 0.26737400 -3.17387200 -0.66500600  
H 0.69694900 -3.96601800 -1.27078100  
N 0.95798700 -2.19129400 -0.24675800  
O 2.27188700 -2.28573300 -0.65394000  
C -1.96208200 -4.24243200 -0.80102900  
H -1.56107800 -5.01709600 -1.43811800  
N -3.82846100 -3.31938400 0.31347600  
C -6.67272400 0.61458900 1.13254800  
C -8.08211300 -0.13816500 -0.60458400  
C -8.29023900 1.13259500 -1.03372000  
C -7.67290600 2.23982800 -0.36735700  
H -8.52756100 -0.99529500 -1.08829600  
H -6.04786700 0.33052900 1.96728700  
H -8.92744400 1.30800500 -1.88615100  
C -7.85123700 3.56899800 -0.75863800  
H -7.36668600 4.38491100 -0.23039500  
N -8.64332700 3.84096000 -1.81421100  
O -8.75824600 5.04880900 -2.10972500  
C -6.84281000 1.90649100 0.74887400  
H -6.34041700 2.68714200 1.30235000  
N -7.29526200 -0.40882000 0.47894400  
H 9.03599600 0.65076200 -2.86869900  
C -5.26193000 -3.34176500 0.66296900  
H -5.34331300 -3.44856900 1.74611100  
H -5.71444200 -4.19686200 0.16422000  
O -5.78149400 -2.12205400 0.21945500  
C -7.00528100 -1.77210700 0.85017100  
H -7.81828100 -2.41091400 0.50936700  
H -6.90683300 -1.83801300 1.93421800

***N*-(pyridin-2-yl)hydroxylamine**

E= -377.20692

|   |             |             |             |
|---|-------------|-------------|-------------|
| C | 0.50494300  | -0.25550300 | -0.00000300 |
| C | -1.65981600 | -1.03600800 | -0.00000200 |
| C | -1.31503700 | 1.32139800  | 0.00000800  |
| H | -2.31858200 | -1.90220100 | -0.00000500 |
| H | -1.69010000 | 2.33957700  | 0.00001300  |
| N | 1.80631300  | -0.51330900 | -0.00000400 |
| H | 2.06760900  | -1.49344200 | -0.00001100 |
| O | 2.77386800  | 0.42403200  | -0.00000200 |
| C | -2.21554300 | 0.23841800  | 0.00000500  |
| H | -3.28685300 | 0.38007400  | 0.00000700  |
| N | -0.35765800 | -1.31582400 | -0.00000600 |
| C | 0.03943700  | 1.09809400  | 0.00000500  |
| H | 0.77249400  | 1.88927300  | 0.00000800  |

### C1d

E= -1629.45129

|   |             |             |             |
|---|-------------|-------------|-------------|
| N | 1.50599300  | 4.25397800  | -0.89105400 |
| C | 1.22550400  | 2.92887400  | -0.33553400 |
| C | 1.88285200  | 1.89069700  | -1.23089400 |
| O | 1.78918800  | 0.56203800  | -0.68402600 |
| C | 1.73848700  | 2.86121600  | 1.08944900  |
| O | 2.79063800  | 2.34963400  | 1.40729600  |
| O | -0.53942300 | 0.08309500  | -1.68590300 |
| P | 0.34156700  | -0.13201700 | -0.50771900 |
| N | 0.82765200  | -1.70702000 | -0.17503000 |
| C | 0.52372900  | -2.66930200 | -1.25478200 |
| C | 0.49800900  | -2.25814200 | 1.15377400  |
| O | -0.13827700 | 0.52171400  | 0.86758900  |
| C | -1.56068400 | 0.48111700  | 1.23291300  |
| C | -1.64984600 | 0.84619600  | 2.69565200  |
| H | 0.91427200  | 4.95660700  | -0.46359300 |
| H | 0.14338100  | 2.79220100  | -0.32520900 |
| H | 1.42548000  | 1.91542800  | -2.21858600 |
| H | 2.94892500  | 2.09229800  | -1.31707000 |
| H | 1.13203600  | 3.40494400  | 1.83277200  |
| H | -0.54458300 | -2.89237100 | -1.23933600 |
| H | 1.11171100  | -3.57029200 | -1.07383900 |
| H | 1.05854700  | -3.18673900 | 1.27208400  |
| H | -0.57349700 | -2.45288800 | 1.22176500  |
| H | 0.80893400  | -1.56236900 | 1.93013600  |
| H | -2.07595100 | 1.20611700  | 0.60225800  |
| H | -1.93738900 | -0.52310600 | 1.02297500  |
| H | -2.69769300 | 0.84784400  | 3.00103500  |
| H | -1.23176400 | 1.83697000  | 2.88013500  |
| H | -1.11247900 | 0.11776800  | 3.30466600  |
| C | 5.80800000  | -2.01827000 | 0.69607300  |
| N | 6.31313400  | -1.10512500 | -0.20174400 |
| C | 4.46529000  | -1.80263700 | 0.75221200  |
| C | 5.32157800  | -0.35714300 | -0.68013100 |
| N | 4.19606500  | -0.76551100 | -0.11160300 |
| H | 3.68690200  | -2.28841200 | 1.31727800  |
| H | 5.42051000  | 0.43642100  | -1.39927000 |
| H | 3.25109700  | -0.37090000 | -0.30444300 |
| H | 6.43655400  | -2.72546700 | 1.20515700  |

|   |             |             |             |
|---|-------------|-------------|-------------|
| H | 2.46881800  | 4.51629100  | -0.70746200 |
| H | 0.81396800  | -2.25034200 | -2.21676000 |
| H | 7.28435000  | -1.00707300 | -0.46073500 |
| C | -4.87225400 | -1.17175400 | 0.61713000  |
| C | -4.17022800 | -0.70756900 | -0.53361000 |
| C | -5.79025300 | 0.87602200  | -0.92963800 |
| C | -6.06150500 | -0.56240600 | 0.94760500  |
| H | -4.44640400 | -1.98263500 | 1.18694300  |
| H | -6.12977500 | 1.69562500  | -1.55877100 |
| H | -6.61234100 | -0.89768100 | 1.81990500  |
| N | -3.03261100 | -1.29436200 | -0.92257500 |
| H | -2.44548500 | -0.75511400 | -1.55076200 |
| O | -2.37436200 | -2.17570000 | -0.11565300 |
| C | -6.55841600 | 0.49093300  | 0.16295900  |
| H | -7.48763600 | 0.99188000  | 0.39427500  |
| N | -4.63276000 | 0.32404200  | -1.29131800 |

### TS1d

E= -1629.44860

|   |             |             |             |
|---|-------------|-------------|-------------|
| N | 2.09586900  | 4.24721800  | -0.55417400 |
| C | 2.15372800  | 2.87615400  | -0.07295800 |
| C | 1.71786500  | 1.93989700  | -1.20841400 |
| O | 1.65039600  | 0.58951800  | -0.75589200 |
| C | 3.52063200  | 2.44307000  | 0.41150400  |
| O | 3.70350900  | 1.51014800  | 1.16606800  |
| O | -0.54510600 | -0.30138000 | -1.74466300 |
| P | 0.14408900  | -0.06948500 | -0.44407200 |
| N | 0.75918400  | -1.38090300 | 0.38382200  |
| C | 0.17350300  | -2.69908500 | 0.14369800  |
| C | 1.07843200  | -1.13903900 | 1.79058700  |
| O | -0.34261600 | 1.14359100  | 0.48781000  |
| C | -1.66651400 | 1.72522400  | 0.37884300  |
| C | -1.52702600 | 3.21049200  | 0.63932800  |
| H | 2.28045300  | 4.89438500  | 0.20322000  |
| H | 1.44582100  | 2.74065000  | 0.74456900  |
| H | 0.75162100  | 2.28497300  | -1.57829400 |
| H | 2.43255100  | 1.97364200  | -2.03297800 |
| H | 4.37457300  | 3.01990500  | 0.01224800  |
| H | -0.71465000 | -2.84914500 | 0.75431600  |
| H | 0.93436600  | -3.45147300 | 0.36870200  |
| H | 1.73053000  | -1.94205300 | 2.13940500  |
| H | 0.17394500  | -1.11858700 | 2.40569900  |
| H | 1.61189300  | -0.19372800 | 1.89601100  |
| H | -2.05309300 | 1.52475900  | -0.61965400 |
| H | -2.30391100 | 1.21873000  | 1.09571600  |
| H | -2.50753300 | 3.68640400  | 0.57906700  |
| H | -0.86616400 | 3.67864700  | -0.09275700 |
| H | -1.11990100 | 3.38788300  | 1.63633800  |
| C | 5.64487300  | -2.29506900 | 0.21777200  |
| N | 4.73792300  | -3.04810400 | -0.49320400 |
| C | 5.04677400  | -1.09594900 | 0.45382200  |
| C | 3.62571000  | -2.34313800 | -0.68503600 |
| N | 3.79804200  | -1.15829500 | -0.11760200 |
| H | 5.38419700  | -0.21708900 | 0.97073700  |
| H | 2.74440200  | -2.67118500 | -1.20562300 |
| H | 3.08387400  | -0.42049000 | -0.13687700 |

H 6.61368500 -2.67189100 0.48875100  
H 2.80715500 4.41018100 -1.25998300  
H -0.10786400 -2.78249000 -0.90479600  
H 4.88215800 -3.99229900 -0.82102500  
C -4.71439700 -0.69925000 1.12881300  
C -4.18989300 -0.78316300 -0.19559900  
C -6.28689700 -0.47029900 -1.08600400  
C -6.06624400 -0.49745700 1.28376500  
H -4.03575000 -0.79859600 1.96144800  
H -6.89097000 -0.37811400 -1.98585200  
H -6.48692600 -0.42859900 2.28118200  
N -2.89406800 -1.01932700 -0.40136900  
H -2.51841600 -0.87859400 -1.33261800  
O -1.97849900 -0.98886400 0.60123400  
C -6.89879600 -0.37943100 0.15838100  
H -7.96405900 -0.21941900 0.24521000  
N -4.98485000 -0.66144300 -1.29440800

### INd

E= -1629.46315

N 2.19491900 4.07842200 -0.97247800  
C 2.23300700 2.80675400 -0.26148600  
C 1.63126500 1.70848400 -1.15320600  
O 1.51169900 0.50352900 -0.44286700  
C 3.62581900 2.36222700 0.11189400  
O 3.89840100 1.66159500 1.06486400  
O -0.50485200 -0.32799900 -1.59643600  
P -0.15790000 -0.11824800 -0.13612000  
N 0.63390600 -1.32375200 0.78778200  
C -0.05904900 -2.59220400 0.97123400  
C 1.28023500 -0.88259800 2.02286900  
O -0.40513300 1.31060200 0.64238000  
C -1.66855900 1.99072000 0.56760900  
C -1.38125600 3.47697100 0.65986600  
H 2.59319800 4.81533500 -0.40178500  
H 1.62143500 2.85974100 0.63867100  
H 0.66383100 2.06826900 -1.50778700  
H 2.26951500 1.55406400 -2.03267100  
H 4.41888500 2.68787700 -0.58872300  
H -0.79859600 -2.55717800 1.77633700  
H 0.69000300 -3.35380500 1.20802600  
H 1.96884600 -1.66438700 2.35478100  
H 0.55096500 -0.70720000 2.82444600  
H 1.84655400 0.02917500 1.84770100  
H -2.16439500 1.74508900 -0.37328100  
H -2.30794400 1.65680900 1.38271700  
H -2.31291200 4.04297000 0.60337700  
H -0.72537300 3.79341200 -0.15305900  
H -0.89196000 3.71025500 1.60711100  
C 5.36872400 -2.38494800 -0.15246000  
N 4.35979600 -3.24221200 -0.52800000  
C 4.79507000 -1.15763000 -0.01716000  
C 3.21439200 -2.56548600 -0.61413800  
N 3.46012700 -1.30099900 -0.31165500  
H 5.20817100 -0.21098100 0.28010400  
H 2.25495400 -2.97323500 -0.87668600

H 2.70961700 -0.55229000 -0.31993300  
H 6.38087600 -2.71745200 -0.01405300  
H 2.75904000 4.02746100 -1.81548600  
H -0.56879100 -2.87975300 0.05266800  
H 4.45916900 -4.23058200 -0.70768100  
C -4.45967600 -0.40138400 0.93663000  
C -3.94453100 -0.87559000 -0.28380600  
C -6.00592300 -0.78724900 -1.27134800  
C -5.81174800 -0.11667200 1.00372200  
H -3.79978100 -0.27496600 1.78074500  
H -6.59151100 -0.95077600 -2.17051900  
H -6.23951300 0.25335200 1.92761100  
N -2.62416000 -1.26250200 -0.41330700  
H -2.24391600 -1.09470000 -1.34381300  
O -1.76886600 -0.64918400 0.51157800  
C -6.61811200 -0.31101300 -0.12007200  
H -7.67804100 -0.10009100 -0.10490300  
N -4.70341300 -1.06515000 -1.37222000

### TS2d

E= -1629.46136

N -3.43444100 -3.72472800 -0.54961500  
C -2.82508600 -2.45526400 -0.14082000  
C -2.33438300 -1.73390100 -1.39345100  
O -1.64359900 -0.53543900 -1.11692400  
C -3.85891300 -1.62015100 0.57410300  
O -3.85756400 -1.35174200 1.75641500  
O 0.42208500 -1.90582700 -1.04912300  
P 0.16467900 -0.55106100 -0.43619100  
N 0.28974100 0.90834800 -1.29953000  
C 0.32740000 0.80023800 -2.75134800  
C 1.12741500 1.98020300 -0.78474500  
O -0.59102500 -0.31082700 0.98939000  
C 0.02521400 -0.32753800 2.29326500  
C -1.08316100 -0.10431400 3.30092600  
H -3.77131200 -4.22982600 0.26246600  
H -1.99081300 -2.64848100 0.53216600  
H -1.67576200 -2.40751300 -1.93632500  
H -3.19506700 -1.49044500 -2.02860400  
H -4.69815800 -1.29311000 -0.07184000  
H 1.33779100 0.58206900 -3.11825300  
H 0.00094000 1.74598200 -3.19447200  
H 0.81319300 2.91189900 -1.26363600  
H 2.19228900 1.82442700 -0.98779600  
H 0.98524400 2.08691600 0.28952000  
H 0.51672100 -1.28747600 2.44857300  
H 0.77703000 0.45714500 2.35362600  
H -0.67347200 -0.12762500 4.31231800  
H -1.84751700 -0.87353100 3.20123200  
H -1.55122100 0.86795600 3.13653000  
C -3.88567200 3.16973600 0.64993100  
N -3.17876000 3.65404300 -0.42470800  
C -3.63865500 1.82867600 0.68591800  
C -2.53218800 2.63576100 -1.00757000  
N -2.79776900 1.51819600 -0.35706400  
H -3.99364400 1.08010400 1.37271700

|   |             |             |             |
|---|-------------|-------------|-------------|
| H | -1.89049900 | 2.72438400  | -1.86663100 |
| H | -2.27446600 | 0.45436300  | -0.68532300 |
| H | -4.48326200 | 3.80654700  | 1.27657700  |
| H | -4.24131300 | -3.55280800 | -1.14286200 |
| H | -0.34951800 | 0.01423900  | -3.07723800 |
| H | -3.14498000 | 4.61533400  | -0.72805900 |
| C | 4.14861600  | 0.67272600  | 0.94421700  |
| C | 3.98362300  | -0.28614900 | -0.06779400 |
| C | 6.23934900  | -0.56087800 | -0.29395200 |
| C | 5.44142700  | 0.99714400  | 1.31935300  |
| H | 3.28372500  | 1.12605500  | 1.40362600  |
| H | 7.04650600  | -1.07540900 | -0.80449200 |
| H | 5.60809600  | 1.73036700  | 2.09871100  |
| N | 2.72865600  | -0.61801200 | -0.56010000 |
| H | 2.66636400  | -1.58193200 | -0.87248700 |
| O | 1.70926300  | -0.38298100 | 0.37241200  |
| N | 5.00472100  | -0.89958600 | -0.67475900 |
| C | 6.52180700  | 0.37541800  | 0.69135600  |
| H | 7.54384900  | 0.60272700  | 0.95956600  |

### C2d

E= -1629.49134

|   |             |             |             |
|---|-------------|-------------|-------------|
| N | 3.46479300  | -3.68315200 | -1.57284500 |
| C | 2.91194300  | -2.65927200 | -0.70258300 |
| C | 3.93388100  | -2.08617100 | 0.31021100  |
| O | 3.35719400  | -1.16863700 | 1.21287800  |
| C | 2.40351900  | -1.50779400 | -1.52383200 |
| O | 2.67671600  | -1.36085700 | -2.69948600 |
| O | -0.25168500 | -1.97234600 | 0.47214500  |
| P | -0.72785700 | -0.63928300 | 0.91463400  |
| N | -0.40091400 | -0.08617800 | 2.44137300  |
| C | -0.87339400 | -0.91819800 | 3.55303100  |
| C | 0.92046900  | 0.50291800  | 2.69012500  |
| O | -0.24429400 | 0.51557200  | -0.07119400 |
| C | -0.86498800 | 1.83149400  | -0.03115200 |
| C | 0.11412200  | 2.82163700  | -0.61814500 |
| H | 4.07509400  | -3.23751100 | -2.24970800 |
| H | 2.06583100  | -3.04724200 | -0.12871300 |
| H | 4.33271700  | -2.92537500 | 0.88486200  |
| H | 4.76481700  | -1.63622000 | -0.24700100 |
| H | 1.80641900  | -0.76008400 | -0.98608400 |
| H | -0.92422900 | -0.29822300 | 4.44844300  |
| H | -0.19887200 | -1.75850400 | 3.74280900  |
| H | 1.68122700  | -0.26380300 | 2.85394700  |
| H | 0.84727000  | 1.13809000  | 3.57351400  |
| H | 1.22233200  | 1.11447300  | 1.84206500  |
| H | -1.78099700 | 1.77689600  | -0.61821400 |
| H | -1.11332600 | 2.07342900  | 1.00275900  |
| H | -0.34114300 | 3.81268900  | -0.63976200 |
| H | 0.37914600  | 2.53544000  | -1.63570800 |
| H | 1.02549600  | 2.86608800  | -0.02056900 |
| C | 3.72957800  | 3.07141500  | -1.50559100 |
| N | 3.88195900  | 3.50308500  | -0.21257800 |
| C | 3.53316000  | 1.72069500  | -1.41671100 |
| C | 3.77798900  | 2.42859300  | 0.59832800  |
| N | 3.56531500  | 1.32916400  | -0.09718000 |

|   |             |             |             |
|---|-------------|-------------|-------------|
| H | 3.36326000  | 1.01398100  | -2.21246400 |
| H | 3.86602300  | 2.49387500  | 1.67049700  |
| H | 3.38358800  | -0.28146900 | 0.78762400  |
| H | 3.77186400  | 3.74380100  | -2.34382400 |
| H | 4.03497500  | -4.32210200 | -1.02973800 |
| H | -1.87098300 | -1.29616200 | 3.33857200  |
| H | 4.04776700  | 4.45178400  | 0.08361100  |
| C | -4.50684600 | 0.85949800  | 0.04880200  |
| C | -4.15455600 | -0.37144900 | -0.50827400 |
| C | -6.08647600 | -0.51115500 | -1.70420000 |
| C | -5.72991800 | 1.39852600  | -0.32516400 |
| H | -3.85569800 | 1.35719600  | 0.75073900  |
| H | -6.68846600 | -1.08789100 | -2.39699900 |
| H | -6.04650900 | 2.34888500  | 0.08490500  |
| N | -2.90575400 | -0.98285000 | -0.26776100 |
| H | -3.01566900 | -1.99164700 | -0.21491200 |
| O | -2.36705100 | -0.54545900 | 0.97213400  |
| N | -4.91722500 | -1.05481200 | -1.35704300 |
| C | -6.54163600 | 0.71012600  | -1.22371600 |
| H | -7.49943700 | 1.10067700  | -1.53652800 |

### 1

E= -1376.09058307

|   |             |             |             |
|---|-------------|-------------|-------------|
| C | -7.94579600 | 0.54519000  | -0.36049500 |
| C | -7.33644000 | -0.72141700 | -0.08840500 |
| C | -5.32496600 | -0.00262500 | -0.97745900 |
| C | -7.17789600 | 1.51409000  | -0.95488400 |
| H | -8.98034300 | 0.68697800  | -0.09056700 |
| H | -7.61271400 | 2.48364100  | -1.17532500 |
| N | -8.03820100 | -1.69306200 | 0.48051200  |
| H | -7.54190800 | -2.56274500 | 0.64261700  |
| O | -9.33340100 | -1.60141400 | 0.84112800  |
| C | -5.83257900 | 1.25901800  | -1.28250000 |
| H | -5.20863700 | 2.00654500  | -1.75299100 |
| N | -6.03188000 | -0.97694400 | -0.40017800 |
| C | -3.87603400 | -0.32741400 | -1.25905900 |
| H | -3.45315400 | 0.42085400  | -1.93464700 |
| C | -3.04474300 | -0.38211400 | 0.02729200  |
| H | -3.11840700 | 0.58119000  | 0.54317400  |
| H | -3.47803100 | -1.13390000 | 0.69298100  |
| C | -1.57715400 | -0.70476200 | -0.23972900 |
| H | -1.14768200 | 0.05246200  | -0.90361600 |
| H | -1.49769900 | -1.66431500 | -0.76175900 |
| C | -0.74942400 | -0.76152600 | 1.05190600  |
| H | -0.83329900 | 0.19380800  | 1.57255800  |
| H | -1.16881600 | -1.52855500 | 1.70912900  |
| C | 0.69788800  | -1.08557700 | 0.77110600  |
| C | 1.64802300  | -0.10370200 | 0.56025400  |
| C | 1.07070800  | -2.45145700 | 0.65583800  |
| C | 2.99530400  | -0.46326300 | 0.24100800  |
| C | 1.29027100  | 1.34329100  | 0.65853900  |
| C | 2.35102200  | -2.82184500 | 0.34652000  |
| H | 0.31223000  | -3.20851600 | 0.82055900  |
| C | 3.34729300  | -1.83648300 | 0.13171500  |
| C | 4.00493700  | 0.51230200  | 0.01995900  |
| C | 1.25980000  | 1.98495700  | 1.89991200  |

|   |             |             |             |   |              |             |             |
|---|-------------|-------------|-------------|---|--------------|-------------|-------------|
| C | 0.99597700  | 2.07975700  | -0.49236500 | H | -3.56638000  | 0.81501900  | 3.06954000  |
| H | 2.62110100  | -3.86806800 | 0.26581600  | H | -5.20490200  | 1.44491400  | 2.80862700  |
| C | 4.68680400  | -2.19194900 | -0.17257300 | C | -9.35686900  | -3.05125400 | -0.09077200 |
| C | 5.28928400  | 0.14570600  | -0.28257900 | N | -9.09407100  | -3.58278600 | 1.15234200  |
| H | 3.77270000  | 1.56695700  | 0.08331000  | C | -8.16195600  | -2.63499100 | -0.58980900 |
| C | 0.93053500  | 3.33486300  | 1.99024300  | C | -7.79120800  | -3.49776100 | 1.40970300  |
| H | 1.49235000  | 1.41877400  | 2.79404300  | N | -7.21490600  | -2.92578200 | 0.36267300  |
| C | 0.66770900  | 3.43038700  | -0.40331900 | H | -7.90139900  | -2.15388900 | -1.51513400 |
| H | 1.02778600  | 1.58874500  | -1.45790200 | H | -7.28838200  | -3.82612900 | 2.30119300  |
| C | 5.64200300  | -1.23311700 | -0.37417500 | H | -6.21235900  | -2.73538800 | 0.28553500  |
| H | 4.96795300  | -3.23568500 | -0.24442700 | H | -10.34943300 | -3.01642300 | -0.50018700 |
| O | 6.24642500  | 1.11139300  | -0.46827100 | H | -2.06061900  | -4.40280700 | 1.05480900  |
| C | 0.63315900  | 4.06007000  | 0.83850500  | H | -5.87998600  | 0.08287300  | -3.23414500 |
| H | 0.90787600  | 3.81946100  | 2.95818000  | H | -9.77872000  | -3.97705600 | 1.78166400  |
| H | 0.43948600  | 3.98900000  | -1.30226600 | C | -3.28839600  | 4.79410900  | -0.07972900 |
| O | 6.92577200  | -1.59751800 | -0.69183900 | C | -3.02602700  | 3.73780500  | -0.99976000 |
| C | 6.66665600  | 1.24212400  | -1.83358500 | C | -0.74384500  | 4.01496800  | -0.75322900 |
| H | 0.37751500  | 5.10969400  | 0.90840900  | C | -2.21315600  | 5.44936500  | 0.47484300  |
| C | 7.86516300  | -1.35870500 | 0.36581600  | H | -4.31426900  | 5.04067600  | 0.14364700  |
| H | 7.41269500  | 2.03240400  | -1.84909900 | H | -2.38070000  | 6.25912500  | 1.17716700  |
| H | 7.10239100  | 0.31045600  | -2.19159000 | N | -4.03073900  | 3.08741300  | -1.59692700 |
| H | 5.81704800  | 1.52302800  | -2.45861900 | H | -3.77648700  | 2.19674700  | -2.01329300 |
| H | 7.58737900  | -1.93880900 | 1.24766700  | O | -5.31904400  | 3.21214500  | -1.16409700 |
| H | 8.83179600  | -1.69063200 | -0.00404200 | C | -0.90247400  | 5.07162800  | 0.14198600  |
| H | 7.90370400  | -0.29867700 | 0.61232400  | H | -0.04098400  | 5.56563300  | 0.57013300  |
| H | -3.81813900 | -1.29855700 | -1.75931200 | N | -1.76024800  | 3.35762900  | -1.31687900 |

### C1e

E= -2628.34444259

|   |             |             |             |   |            |             |             |
|---|-------------|-------------|-------------|---|------------|-------------|-------------|
| N | -1.72423100 | -3.46940300 | 0.84438300  | H | 0.09982700 | 1.44155000  | -0.79174600 |
| C | -2.83649100 | -2.52371500 | 0.75594800  | C | 2.25640900 | 1.55700900  | -0.83698100 |
| C | -3.54915900 | -2.76256500 | -0.56717000 | H | 3.04474700 | 2.24331400  | -0.51066500 |
| O | -4.76420100 | -1.99679000 | -0.69208900 | H | 2.33918800 | 1.47628300  | -1.92623900 |
| C | -3.75136200 | -2.70214500 | 1.94907200  | C | 2.50387100 | 0.17829200  | -0.20941700 |
| O | -4.86187500 | -3.19058800 | 1.89554200  | H | 2.43999400 | 0.26093900  | 0.87678200  |
| O | -3.65367500 | 0.05612100  | -1.78944400 | H | 1.71277100 | -0.50493000 | -0.53191500 |
| P | -4.69167400 | -0.37508100 | -0.81501600 | C | 3.84316200 | -0.38335700 | -0.62155400 |
| N | -6.25139600 | 0.03365500  | -1.16036300 | C | 4.98824100 | -0.19955200 | 0.13074500  |
| C | -6.51709900 | 0.57340900  | -2.50107700 | C | 3.92926800 | -1.06366300 | -1.86549200 |
| C | -7.10834500 | 0.62980800  | -0.13118600 | C | 6.24406300 | -0.69989700 | -0.33702000 |
| O | -4.42467100 | -0.00386900 | 0.71863600  | C | 4.93900400 | 0.52403400  | 1.43688100  |
| C | -3.99766300 | 1.36536800  | 1.02919400  | C | 5.11896100 | -1.54630400 | -2.33818700 |
| C | -4.15789400 | 1.54919500  | 2.51997400  | H | 3.02188400 | -1.19690600 | -2.44401100 |
| H | -1.07834800 | -3.20419800 | 1.57799600  | C | 6.30798000 | -1.37684000 | -1.58557500 |
| H | -2.42371400 | -1.51485000 | 0.79138600  | C | 7.44446300 | -0.53741300 | 0.40500900  |
| H | -2.88110500 | -2.52150900 | -1.39182800 | C | 4.58288300 | -0.14919000 | 2.60898400  |
| H | -3.85725500 | -3.80403500 | -0.64212200 | C | 5.26185800 | 1.88213000  | 1.50736900  |
| H | -3.30495100 | -2.43578500 | 2.92066300  | H | 5.16787000 | -2.06555900 | -3.28793600 |
| H | -6.32613400 | 1.64921500  | -2.49461200 | C | 7.55242200 | -1.88196200 | -2.04271800 |
| H | -7.55946000 | 0.36825600  | -2.75310200 | C | 8.63644900 | -1.02582600 | -0.06025200 |
| H | -8.14863900 | 0.42871000  | -0.39402100 | H | 7.43694600 | -0.01898500 | 1.35446500  |
| H | -6.93654900 | 1.70775400  | -0.08657500 | C | 4.53948600 | 0.52472300  | 3.82670100  |
| H | -6.90577000 | 0.17985500  | 0.83841200  | H | 4.33670000 | -1.20334400 | 2.55969600  |
| H | -2.95608200 | 1.45778200  | 0.72009600  | C | 5.21979100 | 2.55698600  | 2.72508400  |
| H | -4.61152600 | 2.06524600  | 0.45328200  | H | 5.54855800 | 2.40631100  | 0.60328200  |
| H | -3.81891100 | 2.54882900  | 2.79729300  | C | 8.69382700 | -1.71811300 | -1.30511900 |

|   |             |             |             |
|---|-------------|-------------|-------------|
| H | 7.60985500  | -2.41081000 | -2.98640000 |
| O | 9.77366500  | -0.87458900 | 0.69267100  |
| C | 4.85711800  | 1.87990600  | 3.88702500  |
| H | 4.25936300  | -0.00799800 | 4.72671100  |
| H | 5.47003100  | 3.60968600  | 2.76542900  |
| O | 9.89112000  | -2.19216100 | -1.77715600 |
| C | 10.69874600 | 0.07519800  | 0.14444100  |
| H | 4.82371500  | 2.40427200  | 4.83351200  |
| C | 10.38522900 | -3.32484500 | -1.04845300 |
| H | 11.54557700 | 0.10428900  | 0.82524800  |
| H | 11.02733000 | -0.23652400 | -0.84616000 |
| H | 10.23205400 | 1.06060000  | 0.09168800  |
| H | 9.67740000  | -4.15251700 | -1.12293100 |
| H | 11.32629600 | -3.60192200 | -1.51657700 |
| H | 10.55007100 | -3.06629100 | -0.00343000 |
| H | 0.72082700  | 3.40935400  | -2.18537500 |

**TS1e**

E= -2628.33469673

|   |            |             |             |
|---|------------|-------------|-------------|
| N | 8.34372900 | -2.24896100 | -3.14224000 |
| C | 7.94031700 | -1.74908600 | -1.82959900 |
| C | 6.45129700 | -1.97917700 | -1.62653800 |
| O | 6.00921800 | -1.36489900 | -0.41266700 |
| C | 8.76322000 | -2.38784700 | -0.73157300 |
| O | 8.30217900 | -2.96036400 | 0.23378300  |
| O | 3.81467000 | -0.21171400 | -1.09413300 |
| P | 5.15790200 | 0.06506800  | -0.51060900 |
| N | 5.25644500 | 0.37106100  | 1.12601300  |
| C | 4.12196600 | 1.00699500  | 1.79358200  |
| C | 6.54770600 | 0.85904600  | 1.60541000  |
| O | 6.25300300 | 0.81956000  | -1.41226500 |
| C | 5.89914100 | 1.58319100  | -2.59325000 |
| C | 6.94412300 | 1.29078900  | -3.65071200 |
| H | 9.26848200 | -1.91455000 | -3.38643500 |
| H | 8.12554300 | -0.67278300 | -1.80062600 |
| H | 5.90801400 | -1.58234500 | -2.48440400 |
| H | 6.23750800 | -3.04538800 | -1.54357700 |
| H | 9.85431400 | -2.34515000 | -0.88646100 |
| H | 4.15941000 | 2.08980400  | 1.68152700  |
| H | 4.14817600 | 0.72216200  | 2.84908000  |
| H | 6.59983900 | 0.70327400  | 2.68451600  |
| H | 6.67334000 | 1.92518400  | 1.39217400  |
| H | 7.35814700 | 0.30034900  | 1.13747900  |
| H | 4.90224200 | 1.28709200  | -2.91499700 |
| H | 5.86384700 | 2.62796100  | -2.30812700 |
| H | 6.72251300 | 1.86457100  | -4.55257400 |
| H | 6.96202000 | 0.23007200  | -3.90796600 |
| H | 7.93618400 | 1.57807400  | -3.29756000 |
| C | 6.31305500 | -3.68979600 | 4.01341000  |
| N | 5.14563000 | -2.96081500 | 3.97428200  |
| C | 6.94979700 | -3.45658200 | 2.83420800  |
| C | 5.06844600 | -2.30341500 | 2.81963000  |
| N | 6.15482900 | -2.59298000 | 2.11835800  |
| H | 7.88334400 | -3.81511800 | 2.44367900  |
| H | 4.27381000 | -1.65198600 | 2.50523400  |
| H | 6.33786400 | -2.22853700 | 1.17445300  |

|   |              |             |             |
|---|--------------|-------------|-------------|
| H | 6.58156700   | -4.29533100 | 4.85922900  |
| H | 8.37975500   | -3.26284600 | -3.14710700 |
| H | 3.19538400   | 0.64888300  | 1.34828800  |
| H | 4.44844800   | -2.92238000 | 4.70393200  |
| C | 2.69977700   | 4.53803100  | 0.38701100  |
| C | 2.21430900   | 3.36143500  | -0.25902800 |
| C | 0.02464100   | 4.05351800  | 0.00476100  |
| C | 1.77866700   | 5.45764600  | 0.82851500  |
| H | 3.76486100   | 4.66595100  | 0.49890900  |
| H | 2.11679000   | 6.36222600  | 1.32285400  |
| N | 3.06254200   | 2.45724000  | -0.74485000 |
| H | 2.70267700   | 1.55709500  | -1.04150100 |
| O | 4.39780700   | 2.49915200  | -0.50774700 |
| C | 0.40484100   | 5.23402200  | 0.64081500  |
| H | -0.33899800  | 5.94372800  | 0.97642200  |
| N | 0.88483400   | 3.13132500  | -0.43529500 |
| C | -1.43788700  | 3.72459200  | -0.18228000 |
| H | -1.59789000  | 3.38214100  | -1.20860700 |
| C | -1.90160400  | 2.62886600  | 0.78395400  |
| H | -1.27618100  | 1.74408600  | 0.63562300  |
| H | -1.73996200  | 2.96512100  | 1.81360800  |
| C | -3.37083200  | 2.26505100  | 0.58839000  |
| H | -3.53420100  | 1.93072200  | -0.44125000 |
| H | -3.99493400  | 3.15294500  | 0.73537400  |
| C | -3.83112700  | 1.16054900  | 1.55007600  |
| H | -3.22203200  | 0.26963900  | 1.38918300  |
| H | -3.66035300  | 1.49086300  | 2.57865500  |
| C | -5.29591600  | 0.84357000  | 1.36841200  |
| C | -5.74024600  | -0.12863000 | 0.49154600  |
| C | -6.24460300  | 1.62841300  | 2.07686700  |
| C | -7.14256000  | -0.34649700 | 0.30993900  |
| C | -4.77302800  | -0.96431000 | -0.28115200 |
| C | -7.59084100  | 1.44344300  | 1.91753600  |
| H | -5.87903300  | 2.38916200  | 2.75739100  |
| C | -8.07483200  | 0.45021800  | 1.02950400  |
| C | -7.64454900  | -1.33668600 | -0.57755400 |
| C | -4.17432100  | -2.08329300 | 0.30472300  |
| C | -4.46591600  | -0.64812200 | -1.60762500 |
| H | -8.30233000  | 2.04784000  | 2.46753900  |
| C | -9.46524400  | 0.22539200  | 0.85773900  |
| C | -8.99128300  | -1.52923700 | -0.73464600 |
| H | -6.96693500  | -1.95553900 | -1.15028400 |
| C | -3.27727800  | -2.86517400 | -0.41819100 |
| H | -4.41378500  | -2.33477800 | 1.33116700  |
| C | -3.57003300  | -1.43040900 | -2.33217700 |
| H | -4.93472600  | 0.21326800  | -2.06879200 |
| C | -9.92258900  | -0.73889500 | 0.00141000  |
| H | -10.18300500 | 0.81839400  | 1.41154300  |
| O | -9.44460600  | -2.50865600 | -1.58217300 |
| C | -2.97300900  | -2.53978900 | -1.73819200 |
| H | -2.81839500  | -3.72791600 | 0.04807300  |
| H | -3.33898700  | -1.17346600 | -3.35825000 |
| O | -11.27091000 | -0.92387900 | -0.16992200 |
| C | -10.04666100 | -1.99310000 | -2.77782900 |
| H | -2.27596300  | -3.14770500 | -2.30075200 |
| C | -11.75694700 | -2.14496600 | 0.40521000  |
| H | -10.36016800 | -2.85665000 | -3.35863700 |



|   |              |             |             |
|---|--------------|-------------|-------------|
| H | -10.90877900 | -1.37291500 | -2.53650800 |
| H | -9.31418100  | -1.41343800 | -3.34250400 |
| H | -11.58235000 | -2.14369900 | 1.48266000  |
| H | -12.82488700 | -2.17261000 | 0.20502100  |
| H | -11.26916100 | -3.00470100 | -0.05179500 |
| H | -2.04228900  | 4.62300500  | -0.03246200 |

**INe**

E= -2628.34834477

|   |              |             |             |
|---|--------------|-------------|-------------|
| N | -6.50179000  | -0.49843400 | 4.49637000  |
| C | -7.03337500  | -0.37389000 | 3.14498800  |
| C | -6.07258700  | -1.05605100 | 2.15731800  |
| O | -6.47706900  | -0.82589400 | 0.83309300  |
| C | -8.38761000  | -1.01595100 | 2.96733900  |
| O | -9.22169300  | -0.66461000 | 2.15858800  |
| O | -4.23116600  | -0.84831400 | -0.18646000 |
| P | -5.37119900  | 0.15069400  | -0.21761300 |
| N | -6.63564800  | 0.04447900  | -1.36809500 |
| C | -6.28439700  | 0.19493600  | -2.77380100 |
| C | -7.87980100  | 0.74351200  | -1.05040200 |
| O | -5.55682000  | 1.33136700  | 0.91300700  |
| C | -4.46746600  | 2.19369900  | 1.27925000  |
| C | -4.67616300  | 2.58169300  | 2.73038700  |
| H | -7.11952300  | -0.04805700 | 5.16207200  |
| H | -7.09530600  | 0.67598900  | 2.86032700  |
| H | -5.07276900  | -0.66323000 | 2.35038000  |
| H | -6.04738900  | -2.13580900 | 2.35155800  |
| H | -8.57158300  | -1.89371900 | 3.61629700  |
| H | -6.20072300  | 1.24225500  | -3.07844900 |
| H | -7.06549700  | -0.28681200 | -3.36944000 |
| H | -8.67433100  | 0.35045700  | -1.69073700 |
| H | -7.79752300  | 1.82290500  | -1.23252100 |
| H | -8.15395300  | 0.57404000  | -0.01204900 |
| H | -3.52050700  | 1.66811000  | 1.14456900  |
| H | -4.46241000  | 3.06672900  | 0.62952900  |
| H | -3.87119300  | 3.23976000  | 3.06268900  |
| H | -4.69424900  | 1.69575800  | 3.36743300  |
| H | -5.62444200  | 3.10899900  | 2.84797500  |
| C | -9.84749000  | -3.68535100 | -1.09747500 |
| N | -8.86155400  | -3.66455200 | -2.05761100 |
| C | -9.41249300  | -2.88231400 | -0.08766300 |
| C | -7.86584400  | -2.87665700 | -1.65130200 |
| N | -8.18075900  | -2.39766700 | -0.45881900 |
| H | -9.87347600  | -2.59889700 | 0.84103900  |
| H | -6.96493400  | -2.66039700 | -2.19644300 |
| H | -7.54229700  | -1.74718600 | 0.08568400  |
| H | -10.75183500 | -4.25281500 | -1.21816600 |
| H | -6.45092800  | -1.47666900 | 4.76462400  |
| H | -5.33530900  | -0.29696300 | -2.98127800 |
| H | -8.88206000  | -4.15898400 | -2.93750600 |
| C | -2.59288400  | 3.26386900  | -1.73793000 |
| C | -2.31519500  | 1.88819400  | -1.82240800 |
| C | -0.05783000  | 2.26346500  | -2.05559600 |
| C | -1.52410900  | 4.13828500  | -1.81433800 |
| H | -3.61139700  | 3.59978900  | -1.62212100 |
| H | -1.69487400  | 5.20624900  | -1.75114800 |

|   |             |             |             |
|---|-------------|-------------|-------------|
| N | -3.32455500 | 0.94257800  | -1.84212100 |
| H | -3.05826400 | 0.06404300  | -1.39953800 |
| O | -4.50997200 | 1.37927800  | -1.23354100 |
| C | -0.22947800 | 3.64336000  | -1.97805400 |
| H | 0.62389500  | 4.30484700  | -2.04260500 |
| N | -1.07819900 | 1.39959700  | -1.97516600 |
| C | 1.31401500  | 1.65214700  | -2.18635400 |
| H | 2.03137700  | 2.41516800  | -2.49751500 |
| C | 1.77639400  | 1.01690500  | -0.86946000 |
| H | 1.80897500  | 1.78553900  | -0.09040600 |
| H | 1.03488200  | 0.27595800  | -0.55723000 |
| C | 3.14728600  | 0.35814700  | -0.99597700 |
| H | 3.88523300  | 1.09847500  | -1.32088600 |
| H | 3.11422600  | -0.41707000 | -1.76873800 |
| C | 3.61474000  | -0.26490300 | 0.32675500  |
| H | 3.66125100  | 0.51210200  | 1.09147100  |
| H | 2.87458000  | -1.00054100 | 0.65395100  |
| C | 4.95533100  | -0.94298400 | 0.17811600  |
| C | 6.14815000  | -0.28028000 | 0.40030700  |
| C | 4.98015100  | -2.29041000 | -0.27078100 |
| C | 7.39370400  | -0.95202700 | 0.19072400  |
| C | 6.16143000  | 1.14122000  | 0.85892000  |
| C | 6.15776500  | -2.95364600 | -0.48403300 |
| H | 4.03559200  | -2.79384400 | -0.44358200 |
| C | 7.39577000  | -2.30136800 | -0.25752000 |
| C | 8.64330000  | -0.31174400 | 0.41080600  |
| C | 6.00614900  | 1.45263400  | 2.21265700  |
| C | 6.34488700  | 2.17964500  | -0.05854800 |
| H | 6.16054100  | -3.98273900 | -0.82304100 |
| C | 8.63159900  | -2.97094700 | -0.45165000 |
| C | 9.82404900  | -0.97485900 | 0.20684600  |
| H | 8.68241800  | 0.71757800  | 0.74117300  |
| C | 6.02227400  | 2.77781100  | 2.63971100  |
| H | 5.86917500  | 0.65029900  | 2.92792700  |
| C | 6.36251000  | 3.50545200  | 0.36768500  |
| H | 6.47559100  | 1.94225700  | -1.10781600 |
| C | 9.82131300  | -2.33396700 | -0.22538900 |
| H | 8.64349800  | -4.00348400 | -0.77915500 |
| O | 11.01374400 | -0.33584700 | 0.45006900  |
| C | 6.19974300  | 3.80698300  | 1.71766400  |
| H | 5.89821300  | 3.00581700  | 3.69082900  |
| H | 6.50305400  | 4.30055400  | -0.35362000 |
| O | 11.00552300 | -2.99156500 | -0.44172800 |
| C | 11.74994800 | -0.02873000 | -0.74226200 |
| H | 6.21274200  | 4.83733900  | 2.04950500  |
| C | 11.71167900 | -3.30737900 | 0.76654200  |
| H | 12.65766300 | 0.47444900  | -0.41946300 |
| H | 12.00057200 | -0.93989500 | -1.28355000 |
| H | 11.16450600 | 0.63674700  | -1.37927500 |
| H | 11.10282400 | -3.96232200 | 1.39238900  |
| H | 12.61807700 | -3.82513600 | 0.46373300  |
| H | 11.96482100 | -2.39894700 | 1.31115400  |
| H | 1.28542600  | 0.88257000  | -2.96238300 |

**TS2e**

E= -2628.34834477

|   |              |             |             |            |                |             |             |
|---|--------------|-------------|-------------|------------|----------------|-------------|-------------|
| N | -7.52165000  | -4.04462300 | 2.23472900  | H          | 1.42023400     | 0.06105900  | 0.14799900  |
| C | -7.39172600  | -2.68307300 | 1.73823400  | C          | 3.45399200     | 0.33638900  | -0.52249500 |
| C | -7.12793900  | -2.74113700 | 0.22036600  | H          | 4.10504600     | 1.15716300  | -0.83992000 |
| O | -7.00552100  | -1.47055100 | -0.38280800 | H          | 3.37204600     | -0.35003400 | -1.37175900 |
| C | -8.62801400  | -1.84004200 | 1.95478200  | C          | 4.11064900     | -0.39410400 | 0.65700900  |
| O | -9.70226300  | -2.32205000 | 2.25681400  | H          | 4.20554100     | 0.29537600  | 1.49738600  |
| O | -4.58224600  | -1.60866000 | 0.05944300  | H          | 3.45707300     | -1.21048700 | 0.97721900  |
| P | -5.44913100  | -0.38339300 | -0.10167100 | C          | 5.45904300     | -0.95764300 | 0.27858100  |
| N | -5.89062400  | 0.28176600  | -1.61093700 | C          | 6.63320200     | -0.25000700 | 0.45615400  |
| C | -5.68703700  | -0.58174500 | -2.77058600 | C          | 5.50220500     | -2.23467400 | -0.34208900 |
| C | -5.57800100  | 1.67644500  | -1.89640700 | C          | 7.87984500     | -0.80688600 | 0.02906800  |
| O | -6.34948300  | 0.26399400  | 1.10029300  | C          | 6.62509800     | 1.10174500  | 1.09174500  |
| C | -5.84973200  | 1.12833400  | 2.14315200  | C          | 6.68043100     | -2.78695400 | -0.76481900 |
| C | -6.94356900  | 1.24907800  | 3.18378500  | H          | 4.57155400     | -2.77447300 | -0.47640600 |
| H | -7.44751000  | -4.03574300 | 3.24624600  | C          | 7.90067700     | -2.08707000 | -0.58916800 |
| H | -6.53775400  | -2.18817400 | 2.20447300  | C          | 9.11135500     | -0.11762500 | 0.19647900  |
| H | -6.21198100  | -3.30358200 | 0.06115300  | C          | 6.62147900     | 1.23228600  | 2.48338700  |
| H | -7.96154100  | -3.26624500 | -0.25892800 | C          | 6.63658000     | 2.25547800  | 0.30280000  |
| H | -8.52481400  | -0.76278400 | 1.76278400  | H          | 6.69783600     | -3.76394600 | -1.23304600 |
| H | -4.65383600  | -0.53335100 | -3.13366700 | C          | 9.13932700     | -2.64393000 | -1.00003800 |
| H | -6.35109000  | -0.26410500 | -3.57966800 | C          | 10.29409100    | -0.67105300 | -0.21631200 |
| H | -6.17330900  | 1.98615000  | -2.76047300 | H          | 9.13410400     | 0.86307600  | 0.65247900  |
| H | -4.52222600  | 1.83603100  | -2.13402800 | C          | 6.61808200     | 2.49263100  | 3.07526200  |
| H | -5.85144100  | 2.30544200  | -1.05119800 | H          | 6.61787300     | 0.34039100  | 3.09867100  |
| H | -4.94496500  | 0.70069100  | 2.57061600  | C          | 6.63466300     | 3.51669300  | 0.89385400  |
| H | -5.60388900  | 2.09962100  | 1.71726400  | H          | 6.64935600     | 2.15884000  | -0.77651200 |
| H | -6.62780800  | 1.93647200  | 3.97021200  | C          | 10.31248300    | -1.96292100 | -0.82019000 |
| H | -7.15516800  | 0.28001700  | 3.63800200  | H          | 9.16730000     | -3.62461700 | -1.45936500 |
| H | -7.85967800  | 1.63440500  | 2.73371200  | O          | 11.46909600    | 0.00932500  | -0.01816300 |
| C | -11.18741500 | 0.35888200  | -1.34131100 | C          | 6.62408800     | 3.63744800  | 2.28134400  |
| N | -10.34600000 | 1.08351800  | -2.15082900 | H          | 6.61257400     | 2.58023000  | 4.15440200  |
| C | -10.38907600 | -0.50514300 | -0.65232200 | H          | 6.64160300     | 4.40245500  | 0.27128900  |
| C | -9.08930300  | 0.66710300  | -1.94993800 | O          | 11.49662800    | -2.50890400 | -1.24595300 |
| N | -9.08652600  | -0.29627900 | -1.04640800 | C          | 12.04839900    | 0.51236100  | -1.23029800 |
| H | -10.65052700 | -1.23800700 | 0.09129300  | H          | 6.62211500     | 4.61746500  | 2.74124400  |
| H | -8.21925100  | 1.06037200  | -2.44344200 | C          | 12.35183000    | -2.92547000 | -0.17194800 |
| H | -8.06413300  | -0.87539800 | -0.69058400 | H          | 12.96045600    | 1.02821600  | -0.94151500 |
| H | -12.25002100 | 0.51957000  | -1.32731700 | H          | 12.28149300    | -0.30447700 | -1.91175400 |
| H | -8.47075000  | -4.35294900 | 2.04143200  | H          | 11.36157600    | 1.21401500  | -1.70709500 |
| H | -5.92782400  | -1.60861200 | -2.50984300 | H          | 11.85343800    | -3.69225400 | 0.42385900  |
| H | -10.62093100 | 1.81294700  | -2.79108400 | H          | 13.24322200    | -3.34038100 | -0.63518700 |
| C | -2.49743600  | 2.86573600  | -0.25984900 | H          | 12.61815200    | -2.07731200 | 0.45705200  |
| C | -2.14911200  | 1.54059300  | -0.56087600 | H          | 1.34010300     | 0.92300600  | -2.19172800 |
| C | 0.03631800   | 2.09968300  | -0.98957100 |            |                |             |             |
| C | -1.49728000  | 3.81950700  | -0.34365800 |            |                |             |             |
| H | -3.50890100  | 3.10967400  | 0.02605500  | <b>C2e</b> |                |             |             |
| H | -1.71988300  | 4.85543700  | -0.11912600 | E=         | -2628.37682410 |             |             |
| N | -3.09717200  | 0.52514700  | -0.58894200 | N          | 6.58769600     | 5.04874800  | -0.93526000 |
| H | -2.72009000  | -0.37839300 | -0.32012700 | C          | 6.90605100     | 3.63349200  | -0.84976500 |
| O | -4.20567100  | 0.80444100  | 0.22298900  | C          | 8.42219100     | 3.34859300  | -0.70797800 |
| N | -0.91652600  | 1.16178000  | -0.90789100 | O          | 8.72953200     | 1.97282200  | -0.73169000 |
| C | -0.20766500  | 3.44388500  | -0.71728900 | C          | 6.22274300     | 3.02464500  | 0.34247400  |
| H | 0.59140300   | 4.16906900  | -0.79118300 | O          | 5.73646400     | 3.68920800  | 1.23730500  |
| C | 1.41622500   | 1.60979100  | -1.34473800 | O          | 5.37414800     | 0.77084900  | -1.97720700 |
| H | 2.04101300   | 2.45218600  | -1.65033800 | P          | 5.58017600     | -0.58171600 | -1.40376300 |
| C | 2.07326600   | 0.88036400  | -0.16636700 | N          | 6.90922400     | -1.48156000 | -1.80619000 |
| H | 2.15618700   | 1.56718900  | 0.68214000  | C          | 7.11003600     | -1.75681300 | -3.23204100 |

|   |             |             |             |   |              |             |             |
|---|-------------|-------------|-------------|---|--------------|-------------|-------------|
| C | 8.16414700  | -1.24684200 | -1.08332200 | C | -7.57169100  | 0.85032400  | 0.08210300  |
| O | 5.54585700  | -0.55784600 | 0.18882700  | C | -6.22235300  | -0.90602400 | 1.28226200  |
| C | 5.35363700  | -1.78809100 | 0.94299700  | C | -6.45284700  | 2.60590000  | -1.20481400 |
| C | 5.90948500  | -1.57126500 | 2.33124900  | H | -4.32517100  | 2.54396900  | -1.20803900 |
| H | 6.70766900  | 5.46319500  | -0.01699300 | C | -7.65109100  | 2.00465600  | -0.74428800 |
| H | 6.55394900  | 3.09744300  | -1.73500000 | C | -8.78247200  | 0.25921500  | 0.53434000  |
| H | 8.92466300  | 3.82497300  | -1.55283300 | C | -5.99706800  | -0.80167400 | 2.65777800  |
| H | 8.78374300  | 3.82707100  | 0.21045900  | C | -6.40043100  | -2.17284900 | 0.71896400  |
| H | 6.23172700  | 1.92852200  | 0.39560700  | H | -6.51472500  | 3.48728000  | -1.83199700 |
| H | 7.74479400  | -2.63820900 | -3.32686000 | C | -8.92254300  | 2.53985300  | -1.07613100 |
| H | 7.59303600  | -0.91679900 | -3.73976700 | C | -9.99898800  | 0.78766500  | 0.19315300  |
| H | 8.72347100  | -0.41119300 | -1.50965900 | H | -8.76301600  | -0.62560700 | 1.15630200  |
| H | 8.76565300  | -2.15468700 | -1.14137600 | C | -5.94011800  | -1.94290500 | 3.45348000  |
| H | 7.95792000  | -1.02705000 | -0.03779900 | H | -5.86357700  | 0.17885800  | 3.09921400  |
| H | 4.28370600  | -1.99075000 | 0.96507800  | C | -6.34534200  | -3.31488300 | 1.51417000  |
| H | 5.86345800  | -2.60214600 | 0.42669900  | H | -6.58481200  | -2.25772100 | -0.34556300 |
| H | 5.73268300  | -2.46173600 | 2.93587300  | C | -10.07346100 | 1.95534800  | -0.62229200 |
| H | 5.42131200  | -0.72133100 | 2.80752100  | H | -8.99305100  | 3.42707200  | -1.69368900 |
| H | 6.98248200  | -1.37977300 | 2.29367100  | O | -11.14910400 | 0.20705900  | 0.66512500  |
| C | 8.10514400  | 0.84563200  | 4.14877200  | C | -6.11394300  | -3.20191900 | 2.88296500  |
| N | 9.12764500  | 0.01971900  | 3.75577100  | H | -5.76248900  | -1.84864200 | 4.51733300  |
| C | 7.74938500  | 1.54220400  | 3.02709000  | H | -6.48328200  | -4.29033500 | 1.06507100  |
| C | 9.35476000  | 0.23724400  | 2.44255300  | O | -11.29343800 | 2.47402200  | -0.97479100 |
| N | 8.53648900  | 1.15437600  | 1.96616100  | C | -11.90672100 | -0.46557400 | -0.35064700 |
| H | 6.97796700  | 2.28665100  | 2.91652100  | H | -6.07080000  | -4.08920000 | 3.50166300  |
| H | 10.11563700 | -0.28466200 | 1.88579300  | C | -11.97696400 | 3.11463200  | 0.11172200  |
| H | 8.64754900  | 1.63638500  | 0.18975000  | H | -12.78079000 | -0.88013300 | 0.14481200  |
| H | 7.73498200  | 0.86032900  | 5.15840300  | H | -12.21403100 | 0.23425800  | -1.12641700 |
| H | 7.24206400  | 5.50821900  | -1.55913900 | H | -11.31173500 | -1.27048900 | -0.78597100 |
| H | 6.15525700  | -1.96743000 | -3.70974700 | H | -11.38101800 | 3.94925400  | 0.48531100  |
| H | 9.62600400  | -0.63162600 | 4.34132300  | H | -12.91526400 | 3.48417400  | -0.29369300 |
| C | 2.54010200  | -3.38024800 | -0.95862700 | H | -12.17113700 | 2.40491200  | 0.91451600  |
| C | 2.18689500  | -2.11349900 | -1.42613000 | H | -1.46692900  | -1.57611400 | -2.65922400 |
| C | -0.05053000 | -2.59884100 | -1.44720100 |   |              |             |             |
| C | 1.50386100  | -4.27529100 | -0.73324000 |   |              |             |             |
| H | 3.57288000  | -3.64768200 | -0.79813200 |   |              |             |             |
| H | 1.72298600  | -5.27330600 | -0.37581100 |   |              |             |             |
| N | 3.13726000  | -1.08826400 | -1.62416300 |   |              |             |             |
| H | 2.88155400  | -0.52900800 | -2.43297800 |   |              |             |             |
| O | 4.42085900  | -1.64413100 | -1.87759500 |   |              |             |             |
| N | 0.94021900  | -1.72569800 | -1.67319400 |   |              |             |             |
| C | 0.18915300  | -3.88732800 | -0.97243100 |   |              |             |             |
| H | -0.63547000 | -4.56696700 | -0.80611600 |   |              |             |             |
| C | -1.44751800 | -2.09829900 | -1.69940700 |   |              |             |             |
| H | -2.13715600 | -2.94285700 | -1.76138300 |   |              |             |             |
| C | -1.90409900 | -1.13692500 | -0.59441200 |   |              |             |             |
| H | -1.88383400 | -1.65744400 | 0.36834900  |   |              |             |             |
| H | -1.18903800 | -0.31191300 | -0.52738000 |   |              |             |             |
| C | -3.30546800 | -0.59015400 | -0.85197600 |   |              |             |             |
| H | -4.01883500 | -1.41753500 | -0.92007800 |   |              |             |             |
| H | -3.32782500 | -0.07135600 | -1.81597500 |   |              |             |             |
| C | -3.76175500 | 0.37327500  | 0.25239700  |   |              |             |             |
| H | -3.74775200 | -0.14817600 | 1.21070700  |   |              |             |             |
| H | -3.04833400 | 1.19935400  | 0.32025800  |   |              |             |             |
| C | -5.13718400 | 0.92786200  | -0.03030100 |   |              |             |             |
| C | -6.28979400 | 0.31703600  | 0.42749300  |   |              |             |             |
| C | -5.23920900 | 2.07994400  | -0.85493200 |   |              |             |             |
